# Supplementary material for: Design syntheses of metal–organic layers with rich N-sites for CO2 chemical fixation
Source: Royal Society of Chemistry journal article supplement (doi:10.1039/d2ce00088a), 2022-01-01
Supplement: d2ce00088a1.pdf [file d2ce00088a1.pdf]

# Supporting Information

## Design Syntheses of Metal-organic Layer with Rich N-sites for CO<sub>2</sub> Chemical Fixation

Zhi-Wen Wang<sup>a,b</sup>, Zi-Yi Zhu<sup>b</sup>, Shangda Li<sup>b,\*</sup>, Fei Wang<sup>b,\*</sup>

### 1. Experimental

1.1 Chemicals and Methods

1.2 Synthesis of Ligands

1.3 Synthesis of MOFs

1.4 Characterizations

1.5 Catalysis

#### 1.1 Chemicals and Methods

##### 1.1.1 Chemicals

All chemicals and solvents were used without further purification. L-lactic acid (99%+, damas-beta), D-lactic acid (99%, damas-beta), O-Phenylene diamine (OPD, 99%, damas-beta), Sodium Hydroxide (NaOH, AR, XiLong Scientific), Terephthalic Acid (BDC, 99%, damas-beta), Zinc nitrate hexahydrate (Zn(NO<sub>3</sub>)<sub>2</sub>·6H<sub>2</sub>O, AR, HUSHI), N, N-Dimethylformamide (DMF, AR, HUSHI), Methanol (MeOH, AR, HUSHI), Water (H<sub>2</sub>O, AR, Macklin), Hydrochloric Acid (HCl, AR, HUSHI), Sodium hydroxide aqueous solution (1M NaOH, ANPEL).

##### 1.1.2 Methods

###### IR spectra:

IR spectra (KBr pellets) were recorded on an ABB Bomem MB102 spectrometer over a range of 400-4000 cm<sup>-1</sup>.

###### Powder X-ray diffraction:

Powder X-ray diffraction (PXRD) data were collected on a Rigaku Mini Flex II diffractometer using CuK $\alpha$  radiation ( $\lambda = 1.54056 \text{ \AA}$ ) under ambient conditions.

###### Thermogravimetric analyses:

The thermogravimetric analyses (TGA) were performed on a Mettler Toledo TGA/SDTA 851e analyzer in a nitrogen atmosphere with a heating rate of 10 °C/min.

###### Solid circular dichroism spectra:

The spectra (KBr pellets) were recorded on a MOS-450 spectropolarimeter. The mixture of sample and 50 mg dry KCl powder was well-grounded and then pressed into a disk for the CD measurement.

## Fluorescent (FL):

Fluorescence spectra were investigated by a fluorescent spectrophotometer (Edinburgh, FLS980).

## Proton Nuclear Magnetic Resonance Spectroscopy ( $^1\text{H}$ NMR):

$^1\text{H}$  NMR experiments were carried out on a Bruker spectrometer operating at resonance frequencies of 600 MHz.

## 1.2 Synthesis of Ligands

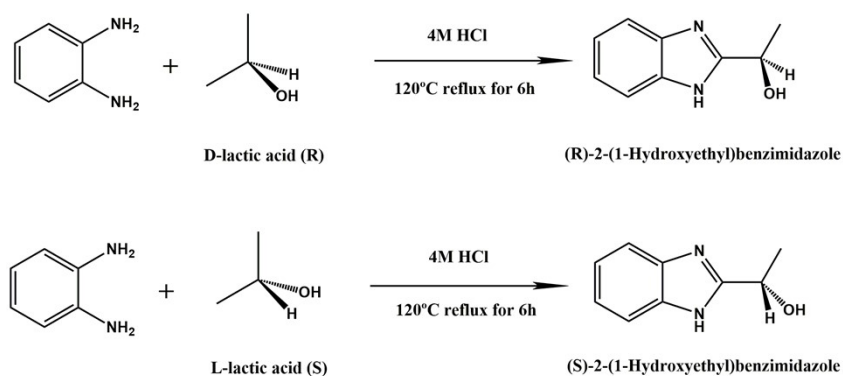

**Scheme S1.** The synthesis method of the OH-bim ligands.

### Synthesis of (S)-2-(1-Hydroxyethyl)benzimidazole (S-OH-bim) :

This compound was prepared based on a known method with some modification. The mixture of o-phenylenediamine (64.9 g, 0.6 mol) and L-lactic acid (58.26 mL, 0.78 mol) in 600 mL 4 M HCl were stirred and heated to reflux for 6 hours under 120 °C. Then slowly cooled and the resultant mixture was basified with aqueous sodium hydroxide solution. The solution was then neutralized with NaOH to afford the product as a brownish solid in 60% yield.

### Synthesis of (R)- 2-(1-Hydroxyethyl)benzimidazole (R-OH-bim):

The R-ligand was obtained by the similar method as described for using (R)-lactic acid instead of (S)-lactic acid (Yield: 55%).

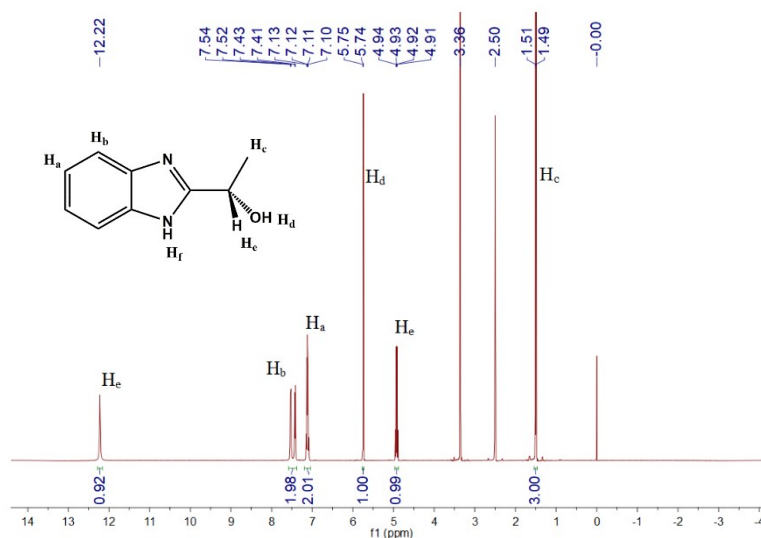

**Figure S1.** 600 MHz  $^1\text{H}$  NMR spectrum of S-OH-bim in  $\text{DMSO-}d_6$ .

### 1.3 Synthesis of MOFs

#### Synthesis of S-1-Zn:

S-OH-bim (0.081 g, 0.5 mmol), H<sub>2</sub>BDC (0.083 g, 0.5 mmol), Zn(NO<sub>3</sub>)<sub>2</sub>·6H<sub>2</sub>O (0.150 g, 0.5 mmol), N, N-Dimethylformamide (2 mL), methanol (2 mL), deionized water (2 mL) was sealed in a 20 mL vial and heated to 100 °C for one day. After cooling to room temperature, the colorless crystals were obtained in the pure phase.

#### Synthesis of R-1-Zn:

It was obtained by the similar method as described for S-1-Zn except for using R-OH-bim instead of S-OH-bim.

#### Synthesis of S-1-Cd:

S-OH-bim (0.032g, 0.2mmol), H<sub>2</sub>BDC (0.032 g, 0.2 mmol), CdCl<sub>2</sub>·5/2H<sub>2</sub>O (0.068 g, 0.3 mmol), deionized water (2 mL), methanol (3 mL) and NaOH aqueous solution (1M, 300 μL) was sealed in a 20 mL vial and heated to 80 °C for 3 days. After cooling to room temperature, the colorless crystals were obtained in the pure phase.

#### Synthesis of R-1-Cd:

It was obtained by the similar method as described for S-1-Cd except for using R-OH-bim instead of S-OH-bim.

**Table S1.** Crystal Data and Structure Refinement for S-1-Zn, R-1-Zn, S-1-Cd and R-1-Cd.

|                                     | S-1-Zn                                                                         | R-1-Zn                                                                         | S-1-Cd                                                                         | R-1-Cd                                                                         |
|-------------------------------------|--------------------------------------------------------------------------------|--------------------------------------------------------------------------------|--------------------------------------------------------------------------------|--------------------------------------------------------------------------------|
| Formula                             | C <sub>44</sub> H <sub>40</sub> N <sub>4</sub> O <sub>16</sub> Zn <sub>3</sub> | C <sub>44</sub> H <sub>40</sub> N <sub>4</sub> O <sub>16</sub> Zn <sub>3</sub> | C <sub>44</sub> H <sub>40</sub> N <sub>4</sub> O <sub>16</sub> Cd <sub>3</sub> | C <sub>44</sub> H <sub>40</sub> N <sub>4</sub> O <sub>16</sub> Cd <sub>3</sub> |
| Mr                                  | 1076.97                                                                        | 1076.97                                                                        | 1218.04                                                                        | 1218.04                                                                        |
| Crystal system                      | orthorhombic                                                                   | orthorhombic                                                                   | orthorhombic                                                                   | orthorhombic                                                                   |
| Space group                         | <i>P</i> 2 <sub>1</sub> 2 <sub>1</sub> 2 <sub>1</sub>                          |
| a (Å)                               | 11.17930(10)                                                                   | 11.18090(10)                                                                   | 11.52880(10)                                                                   | 11.52890(10)                                                                   |
| b (Å)                               | 15.0014(2)                                                                     | 15.00360(10)                                                                   | 11.52880(10)                                                                   | 15.10390(10)                                                                   |
| c (Å)                               | 25.5008(2)                                                                     | 25.50610(10)                                                                   | 26.5164(2)                                                                     | 26.52250(10)                                                                   |
| β (deg)                             | 90                                                                             | 90                                                                             | 90                                                                             | 90                                                                             |
| V (Å <sup>3</sup> )                 | 4276.62(8)                                                                     | 4278.74(5)                                                                     | 4613.32(6)                                                                     | 4618.40(5)                                                                     |
| Z                                   | 4                                                                              | 4                                                                              | 4                                                                              | 4                                                                              |
| D <sub>c</sub> (g·m <sup>-3</sup> ) | 1.666                                                                          | 1.665                                                                          | 1.748                                                                          | 1.742                                                                          |
| μ (mm <sup>-1</sup> )               | 1.636                                                                          | 1.742                                                                          | 7.761                                                                          | 7.741                                                                          |
| F (000)                             | 2184                                                                           | 2184                                                                           | 2392                                                                           | 2388                                                                           |
| Flack                               | 0.017(13)                                                                      | -0.005(7)                                                                      | 0.008(8)                                                                       | -0.013(3)                                                                      |
| R <sub>int</sub>                    | 0.0333                                                                         | 0.0198                                                                         | 0.0365                                                                         | 0.0376                                                                         |
| GOF (F <sup>2</sup> )               | 1.049                                                                          | 1.082                                                                          | 1.064                                                                          | 1.014                                                                          |
| R <sub>1</sub> (I > 2σ(I))          | 0.0326                                                                         | 0.0278                                                                         | 0.0449                                                                         | 0.0205                                                                         |
| wR <sub>2</sub> (I > 2σ(I))         | 0.0801                                                                         | 0.0706                                                                         | 0.122                                                                          | 0.0508                                                                         |
| R <sub>1</sub> (all data)           | 0.035                                                                          | 0.0293                                                                         | 0.0461                                                                         | 0.0224                                                                         |
| wR <sub>2</sub> (all data)          | 0.0819                                                                         | 0.071                                                                          | 0.123                                                                          | 0.0516                                                                         |
| CCDC No.                            | 2123927                                                                        | 2123925                                                                        | 2123926                                                                        | 2123924                                                                        |

**Table S2.** Hydrogen Bonds for S-1-Zn.

| D    | H    | A    | d(D-H)/Å | d(H-A)/Å | d(D-A)/Å | D-H-A/° |
|------|------|------|----------|----------|----------|---------|
| O00H | H00H | O01O | 0.84     | 1.81     | 2.621(6) | 162.7   |
| O00I | H00I | O00M | 0.84     | 1.87     | 2.703(5) | 172.1   |

|      |      |                   |      |      |          |       |
|------|------|-------------------|------|------|----------|-------|
| N00K | H00K | O00B <sup>1</sup> | 0.88 | 1.93 | 2.789(4) | 166.4 |
| N00L | H00L | O00E <sup>2</sup> | 0.88 | 1.86 | 2.742(4) | 176.2 |
| O00M | H00M | O007 <sup>3</sup> | 0.84 | 2.00 | 2.836(5) | 171.3 |

Symmetric operation code: <sup>1</sup>1/2-X,1-Y,1/2+Z; <sup>2</sup>3/2-X,1-Y,-1/2+Z; <sup>3</sup>-1+X,+Y,+Z

**Table S3.** Hydrogen Bonds for R-1-Zn.

| D   | H   | A                | d(D-H)/Å | d(H-A)/Å | d(D-A)/Å | D-H-A/° |
|-----|-----|------------------|----------|----------|----------|---------|
| O50 | H50 | O66              | 0.84     | 1.82     | 2.622(5) | 159.0   |
| O62 | H62 | O64              | 0.84     | 1.87     | 2.705(4) | 173.6   |
| N60 | H60 | O23 <sup>1</sup> | 0.88     | 1.93     | 2.793(4) | 166.5   |
| N41 | H41 | O11 <sup>2</sup> | 0.88     | 1.86     | 2.740(4) | 175.9   |
| O64 | H64 | O14 <sup>3</sup> | 0.84     | 2.06     | 2.834(4) | 153.8   |

Symmetric operation code: <sup>1</sup>1/2-X,1-Y,-1/2+Z; <sup>2</sup>3/2-X,1-Y,1/2+Z; <sup>3</sup>-1+X,+Y,+Z

**Table S4.** Hydrogen Bonds for S-1-Cd.

| D    | H    | A                 | d(D-H)/Å  | d(H-A)/Å  | d(D-A)/Å  | D-H-A/° |
|------|------|-------------------|-----------|-----------|-----------|---------|
| N00E | H00E | O00J <sup>1</sup> | 0.86      | 2.01      | 2.856(8)  | 169.8   |
| O00F | H00F | O01B              | 0.858(13) | 1.755(17) | 2.591(8)  | 164(3)  |
| O00K | H00K | O01F <sup>2</sup> | 0.864(13) | 1.73(2)   | 2.554(9)  | 160(4)  |
| N017 | H017 | O005 <sup>3</sup> | 0.86      | 1.93      | 2.788(8)  | 174.5   |
| O01B | H01T | O007 <sup>4</sup> | 0.82      | 1.98      | 2.760(8)  | 158.7   |
| O01F | H01X | O00A              | 0.82      | 1.92      | 2.741(10) | 173.3   |

Symmetric operation code: <sup>1</sup>1-X,-1/2+Y,3/2-Z;<sup>2</sup>1/2+X,1/2-Y,1-Z; <sup>3</sup>-X,1/2+Y,1/2-Z; <sup>4</sup>1/2+X,3/2-Y,1-Z

**Table S5.** Hydrogen Bonds for R-1-Cd.

| D    | H    | A                 | d(D-H)/Å  | d(H-A)/Å  | d(D-A)/Å | D-H-A/° |
|------|------|-------------------|-----------|-----------|----------|---------|
| N00A | H00A | O00I <sup>1</sup> | 0.86      | 2.00      | 2.857(4) | 171.1   |
| O00E | H00E | O00Z              | 0.857(12) | 1.754(14) | 2.593(4) | 166(3)  |
| O00G | H00G | O01M              | 0.880(13) | 1.695(14) | 2.563(5) | 168(3)  |
| O00Z | H00Z | O006 <sup>2</sup> | 0.82      | 1.96      | 2.757(4) | 164.0   |
| N016 | H016 | O005 <sup>3</sup> | 0.86      | 1.95      | 2.802(4) | 174.4   |
| O01M | H01W | O008 <sup>4</sup> | 0.82      | 1.94      | 2.742(5) | 167.7   |

Symmetric operation code: <sup>1</sup>1-X,1/2+Y,1/2-Z; <sup>2</sup>1/2+X,1/2-Y,1-Z; <sup>3</sup>2-X,-1/2+Y,3/2-Z; <sup>4</sup>-1/2+X,3/2-Y,1-Z.

## 1.4 Characterizations

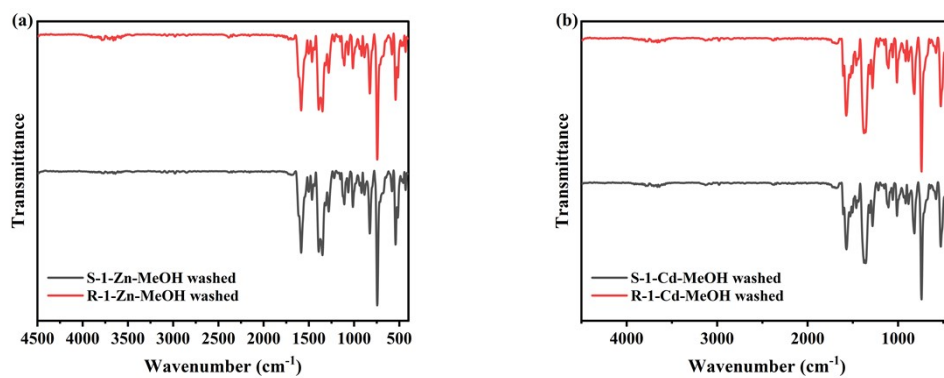

**Figure S2.** The IR spectra of (a) S/R-1-Zn, (b) S/R-1-Cd.

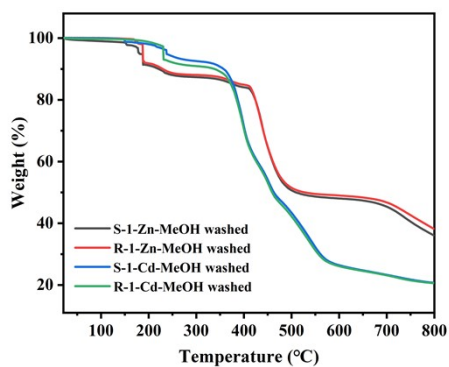

**Figure S3.** The TG plots of S/R-1-Zn and S/R-1-Cd.

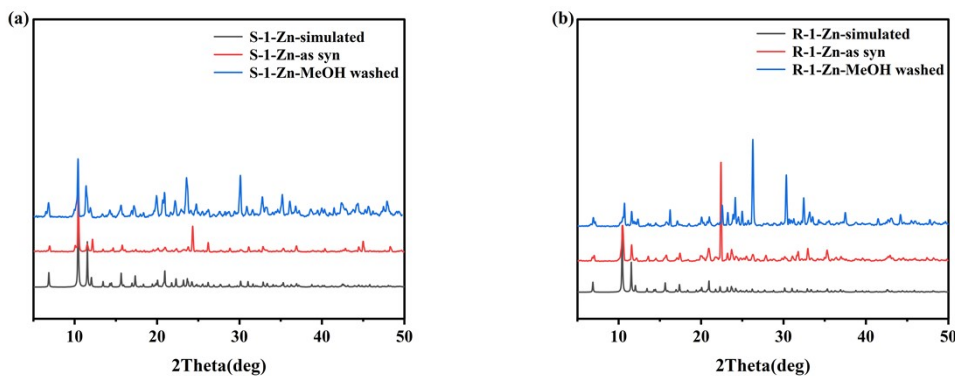

**Figure S4.** The powder XRD patterns of S/R-1-Zn under different conditions.

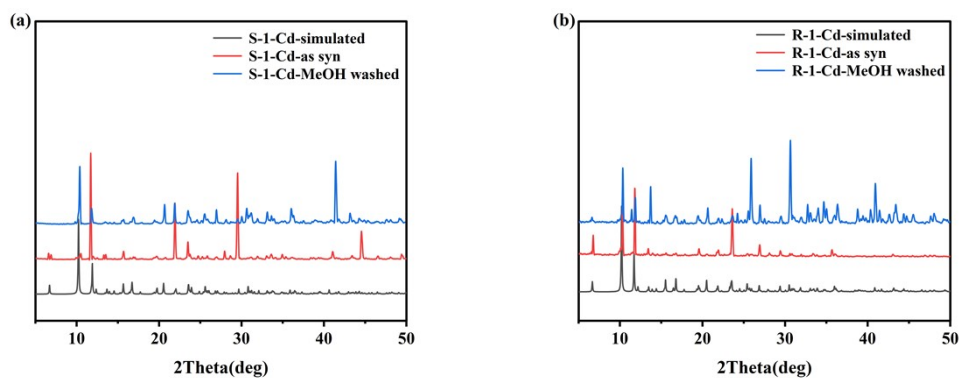

**Figure S5.** The powder XRD patterns of S/R-1-Cd under different conditions.

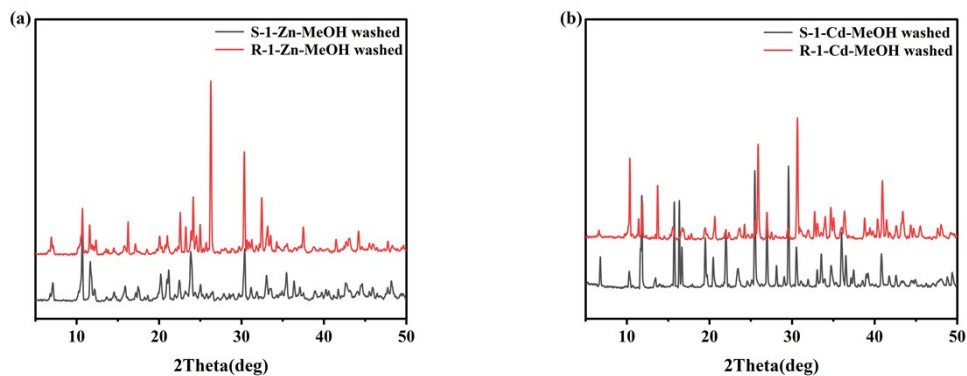

Figure S6. The powder XRD patterns of (a) S/R-1-Zn, (b) S/R-1-Cd.

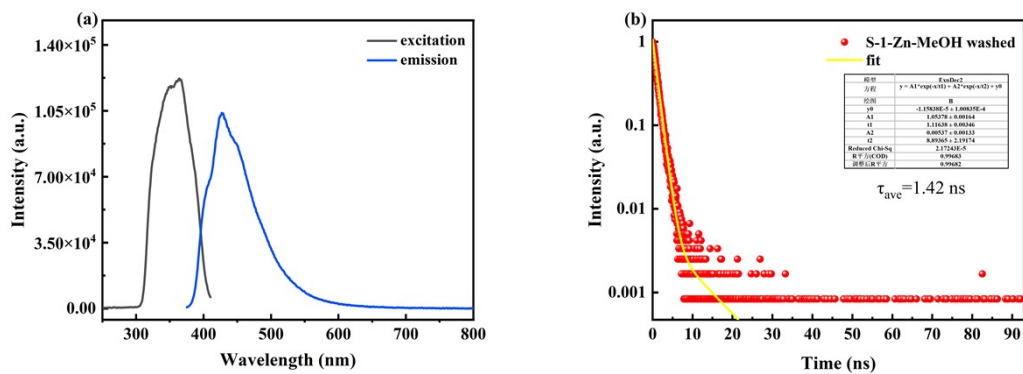

Figure S7. The FI and FI lifetime spectra of S-1-Zn.

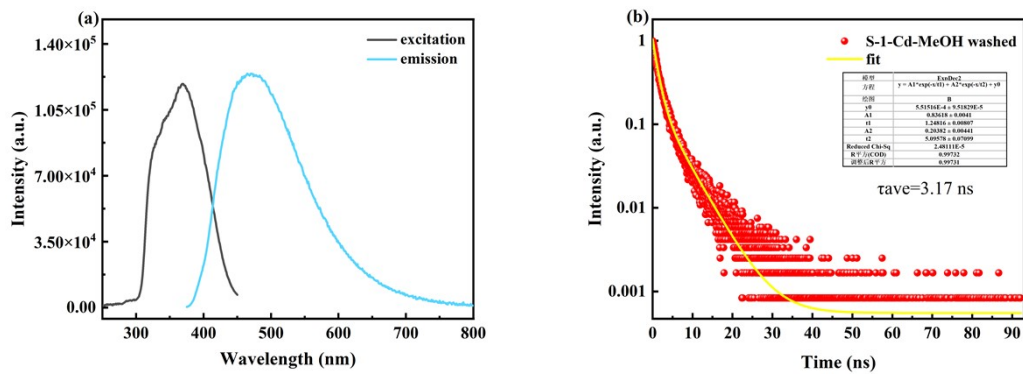

Figure S8. The FI and FI lifetime spectra of S-1-Cd.

## 1.5 Catalysis

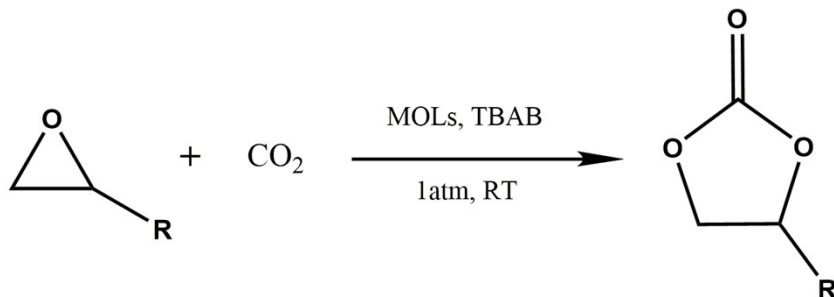

Scheme S2. 2D crystals-catalyzed cycloaddition of CO<sub>2</sub> and epoxides to form cyclic carbonates with TBAB as co-catalyst.

Exfoliation of 2D crystals: 760 mg of crystals were ground and taken in 30ml methanol, sonicated in a cell disrupter for 5 hours, the powder was obtained by filtration, rinsed with methanol, dried in the air for catalyst experimentation.

In each reaction, 20 mmol epoxide substrate, 80 mg catalyst (S-1-Zn/Cd or S-1-Zn/Cd-after spall), and 0.48 g tetra-n-tert-butylammonium bromide (TBAB) were mixed in a Schlenk tube. The Schlenk tube was solvent-free and purged with 1 atm CO<sub>2</sub> at room temperature for 8 h. The reaction mixture was then filtered, and the filtrate was characterized by <sup>1</sup>H NMR (600 MHz, CDCl<sub>3</sub>) to study its conversion ratio. Between each run, the catalyst was recovered by filtration, rinsed with methanol, dried in the air, and reused on subsequent reactions without further treatment.

### <sup>1</sup>H NMR results

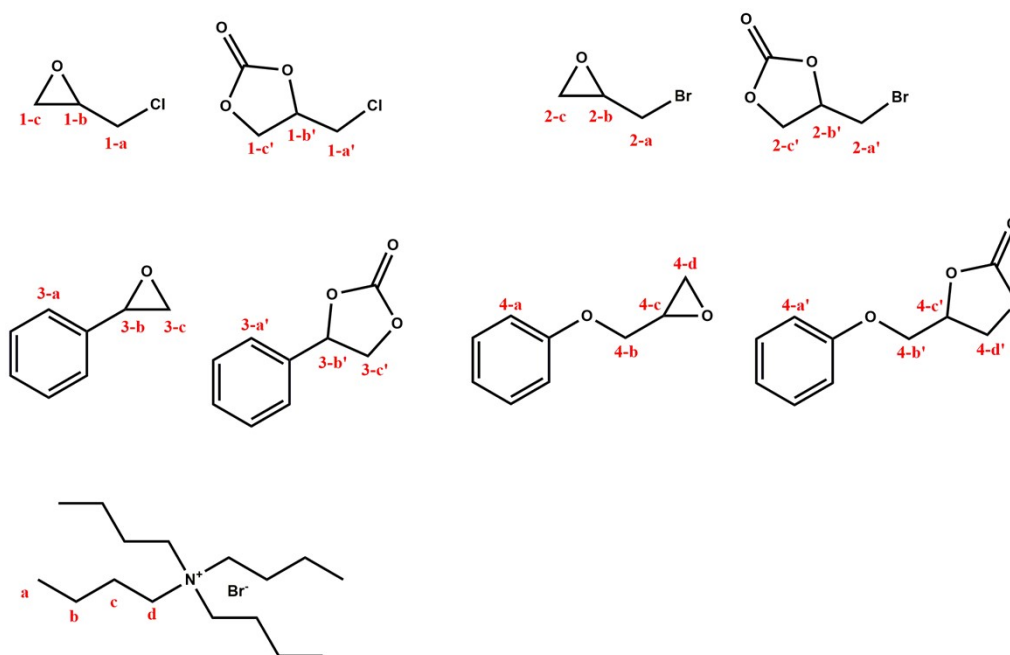

Figure S9. Hydrogen atom position in NMR analysis.

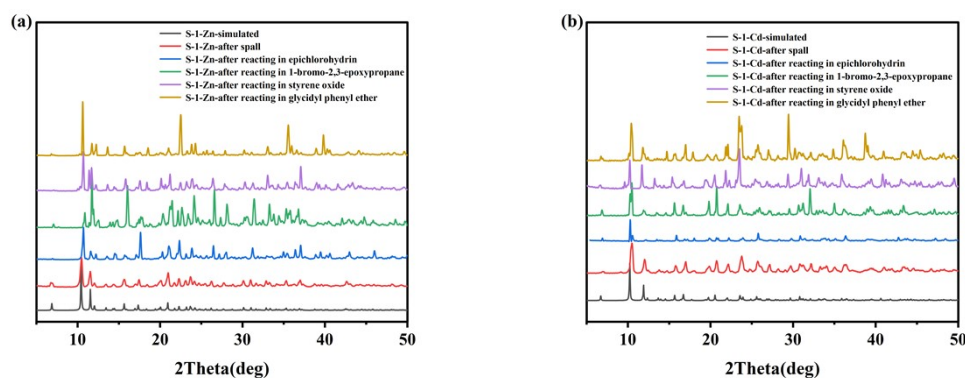

Figure S10. The powder XRD patterns of catalysts (a) S-1-Zn, (b) S-1-Cd.

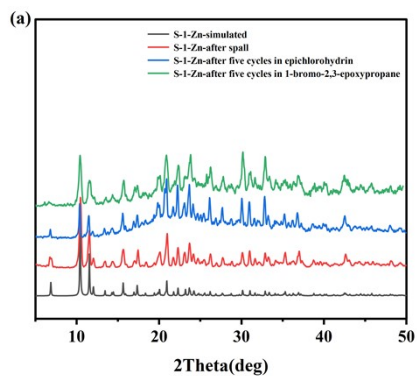

**Figure S11.** The powder XRD patterns of catalysis S-1-Zn as a catalyst after five cycles.

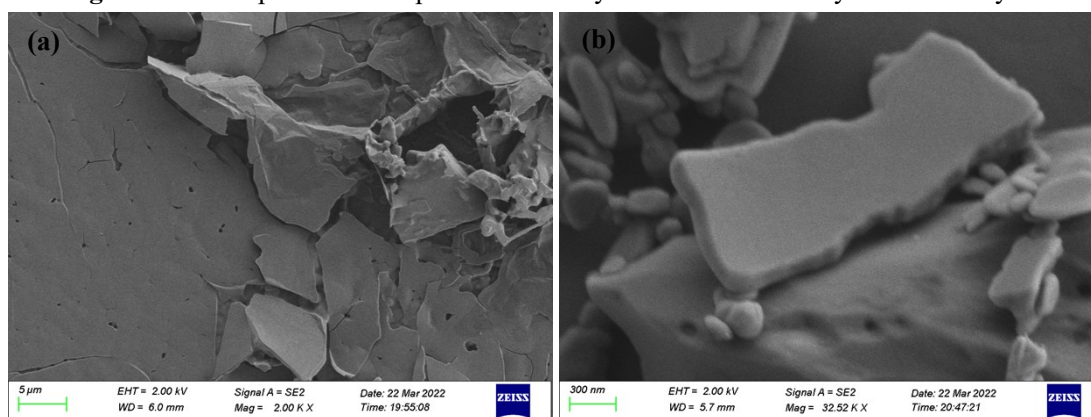

**Figure S12.** SEM image of (a) S-1-Zn-after spall, (b) S-1-Cd-after spall.

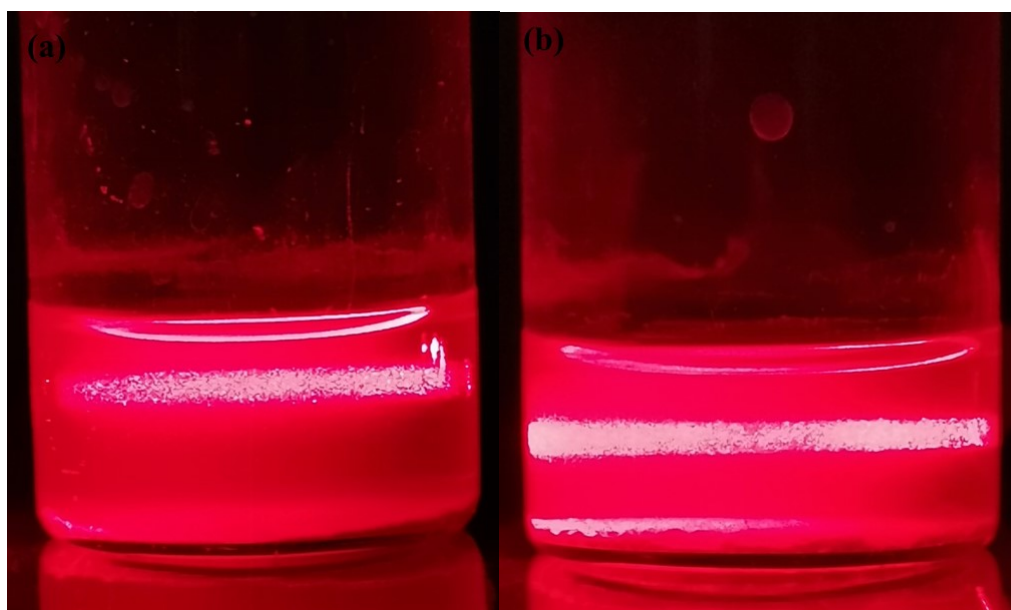

**Figure S13.** Tyndall phenomenon of (a) S-1-Zn-after spall, (b) S-1-Cd-after spall.



**Table S6.** A comparison table of the catalytic performance of the MOFs with other MOFs (1-Bromo-2,3-epoxypropane as substrate).

| Entry | Compounds                                                                               | Temp. | Time (h) | Co-catalyst | Con. [%] | Ref.      |
|-------|-----------------------------------------------------------------------------------------|-------|----------|-------------|----------|-----------|
| 1     | Ba-MOF                                                                                  | RT    | 48       | TBAB        | 94.5     | [1]       |
| 2     | Nd-TTCA                                                                                 | 333K  | 48       | TBAB        | 95       | [2]       |
| 3     | GO                                                                                      | 373K  | 12       | /           | >99.9    | [3]       |
| 4     | [Zn <sub>2</sub> (TCA)(BIB) <sub>2.5</sub> ](NO <sub>3</sub> )                          | 353K  | 4        | TBAB        | >99      | [4]       |
| 5     | [In <sub>2</sub> (L)(OH) <sub>2</sub> ](DMF) <sub>2</sub> (H <sub>2</sub> O)            | 343K  | 12       | TBAB        | 99       | [5]       |
| 6     | [Cu <sub>2</sub> (L)(4,4'-bipy)(OH)](H <sub>2</sub> O)                                  | 353K  | 6        | TBAB        | 91.7     | [6]       |
| 7     | Ti <sub>8</sub> O <sub>8</sub> (OH) <sub>4</sub> (bdc-NH <sub>2</sub> ) <sub>6</sub>    | 373K  | 2        | TBAB        | 86.4     | [7]       |
| 8     | Al(III)@cage                                                                            | RT    | 48       | TBAB        | 87       | [8]       |
| 9     | C <sub>48</sub> H <sub>90</sub> Al <sub>2</sub> Li <sub>4</sub> N <sub>8</sub>          | 327k  | 24       | TBAB        | 85       | [9]       |
| 10    | Cu <sub>4</sub> [(C <sub>57</sub> H <sub>32</sub> N <sub>12</sub> )(COO) <sub>8</sub> ] | RT    | 48       | TBAB        | 88       | [10]      |
| 11    | HKUST-1                                                                                 | RT    | 48       | TBAB        | 57       | [10]      |
| 12    | S-1-Zn-after spall                                                                      | RT    | 24       | TBAB        | 84       | This work |

Imidazole is amphoteric, the uncoordinated N-H group on the OH-bim acts as a Brønsted acid to coordinate with the epoxide substrate, making it subject to nucleophilic attack by a cocatalyst (e.g., usually a tetraalkylammonium halide). The resulting halo alkoxide intermediates react with carbon dioxide to form cyclic carbonates, which then regenerate catalysts and cocatalysts [10,11]. The uncoordinated N-H groups can also act as Lewis basic sites, which can improve the affinity for carbon dioxide [12].

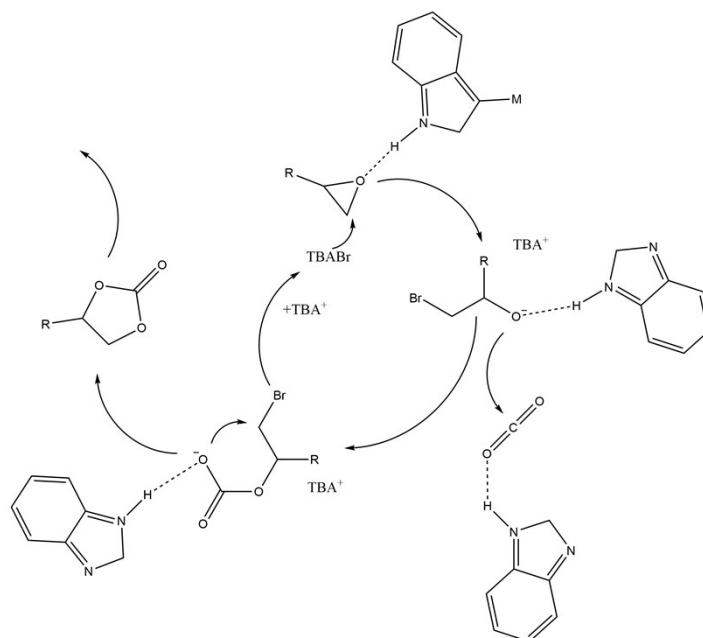

**Figure S14.** The proposed mechanism for the cycloaddition reaction catalyzed by MOLs.

At room temperature, 30mg S-1-Zn was soaked in 5 ml of solution for seven days, such as: methanol, ethanol, acetonitrile, acetone, DMF, DCM, NaOH aqueous solution (pH=13), HCl aqueous solution (pH=1), The stability was proved by P-XRD (Figure S15).

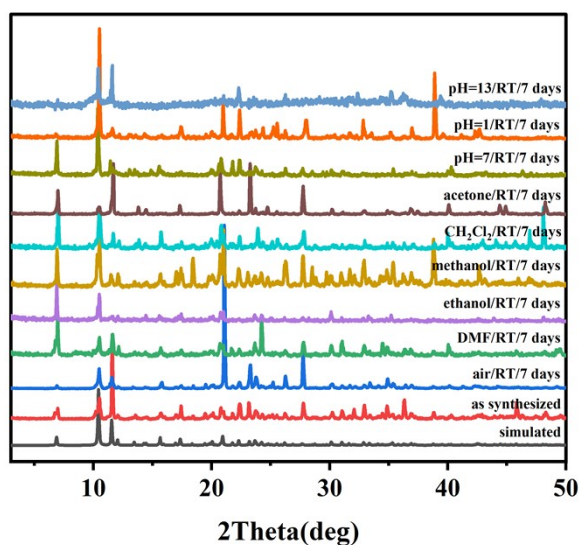

**Figure S15.** Powder XRD patterns of S-1-Zn under different conditions.

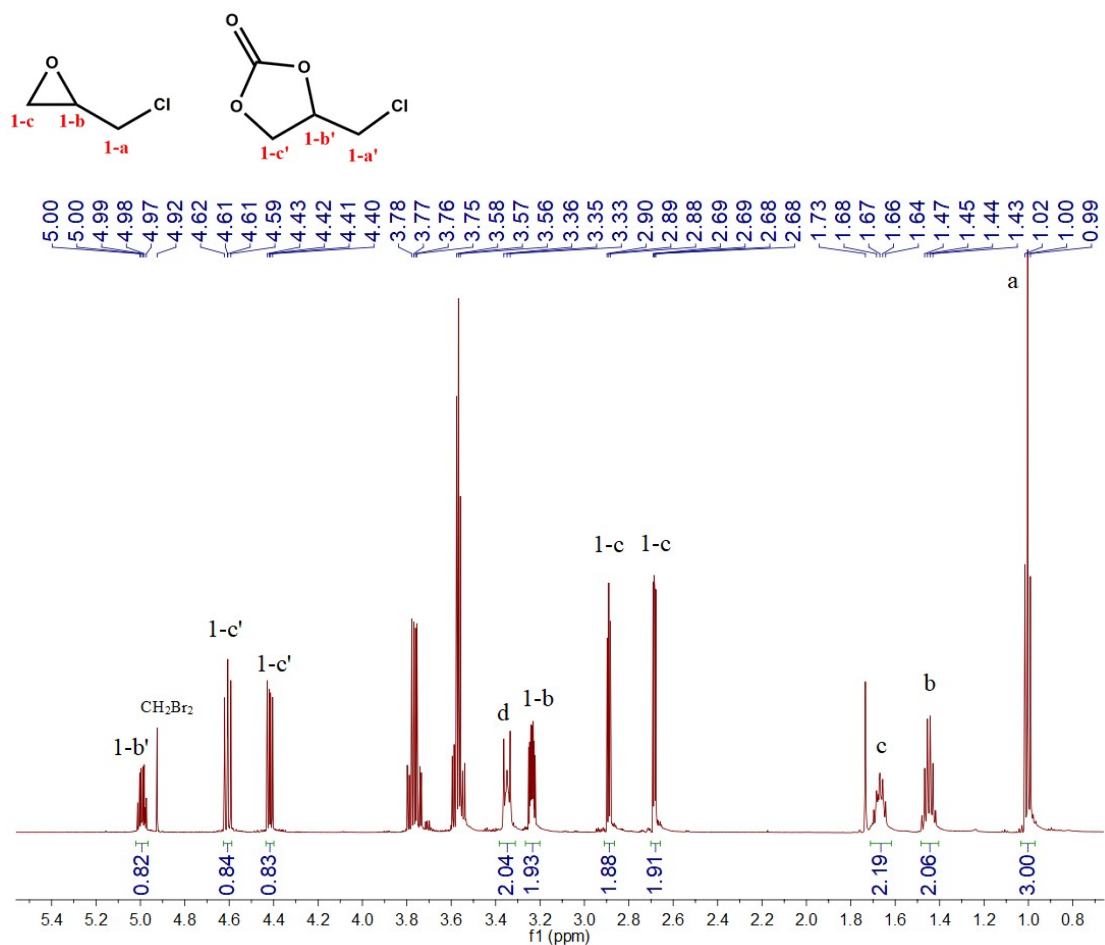

Figure S16. The first run of S-1-Zn-crystal as a catalyst in epichlorohydrin.

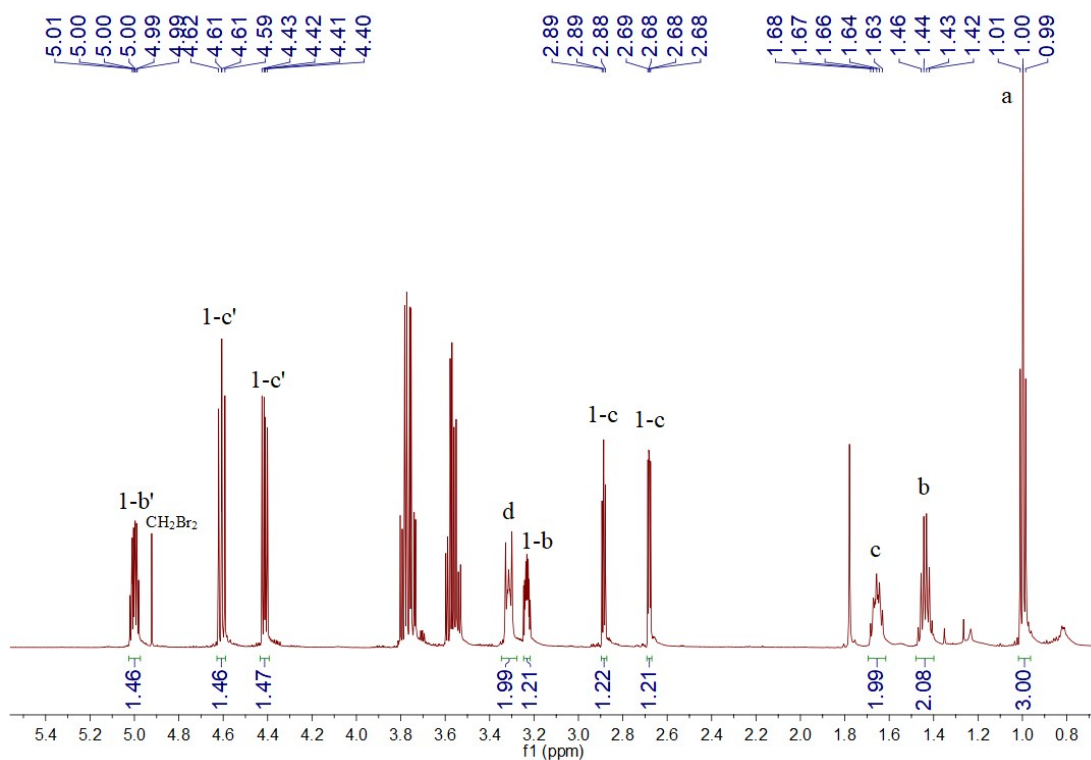

Figure S17. The first run of S-1-Zn-after spall as a catalyst in epichlorohydrin.

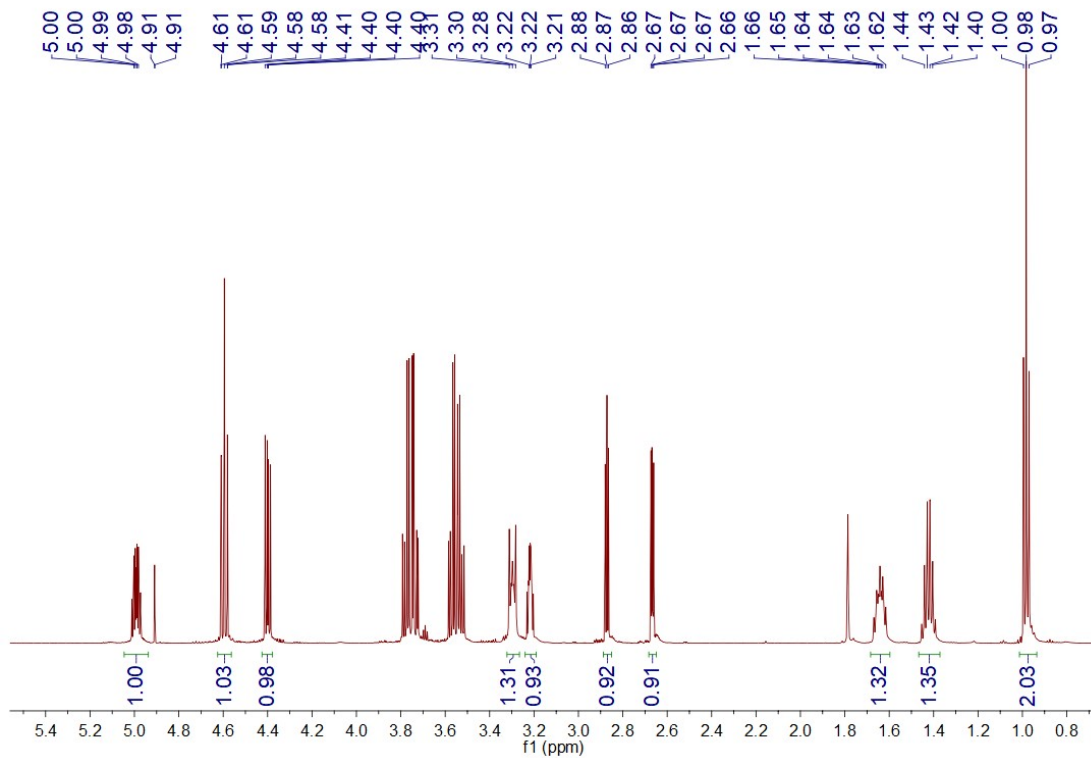

**Figure S18.** The second run of S-1-Zn-after spall as a catalyst in epichlorohydrin.

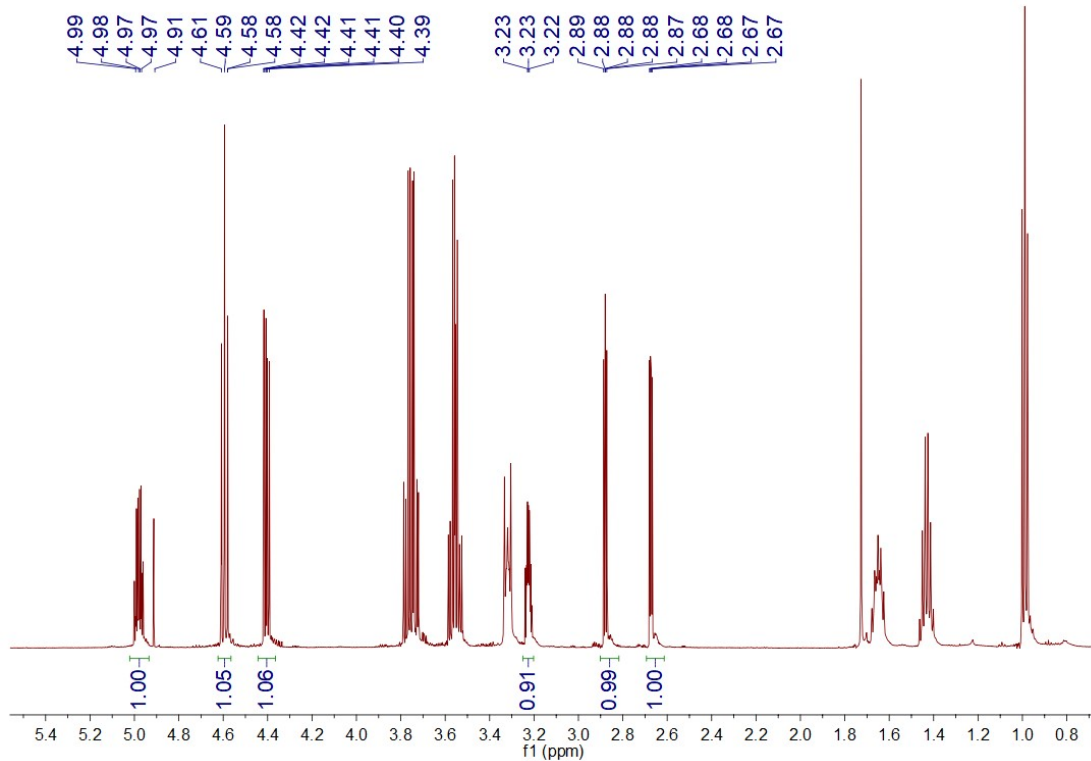

**Figure S19.** The third run of S-1-Zn-after spall as a catalyst in epichlorohydrin.

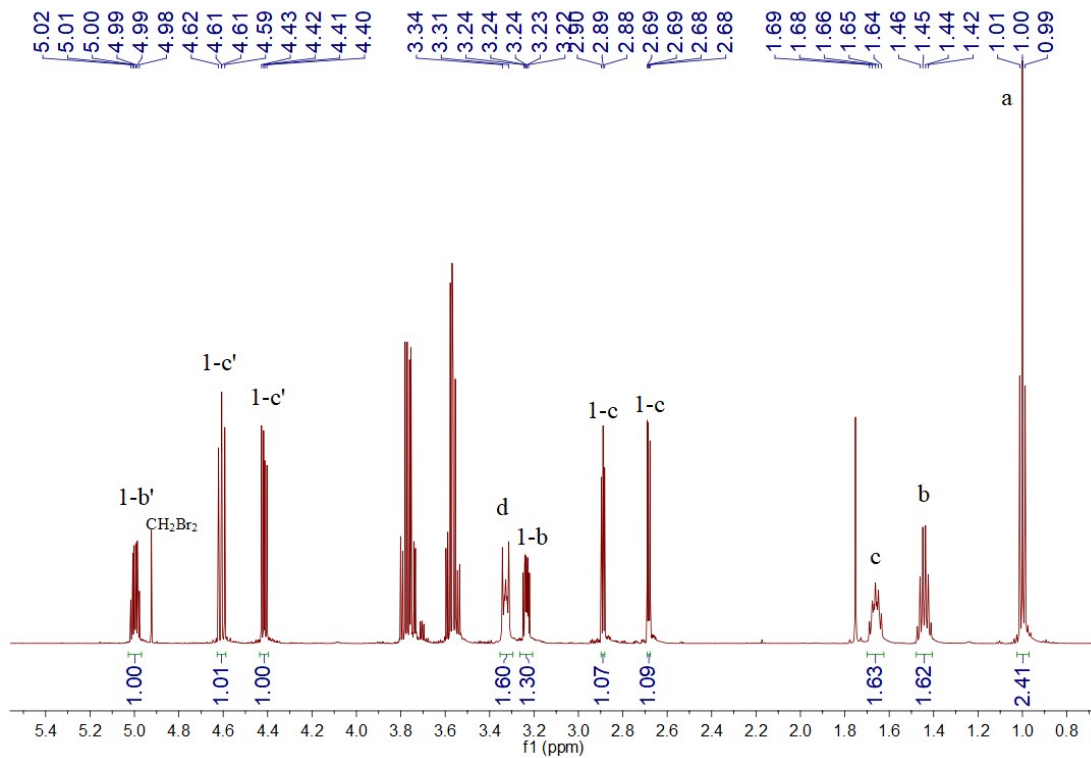

**Figure S20.** The fourth run of S-1-Zn-after spall as a catalyst in epichlorohydrin.

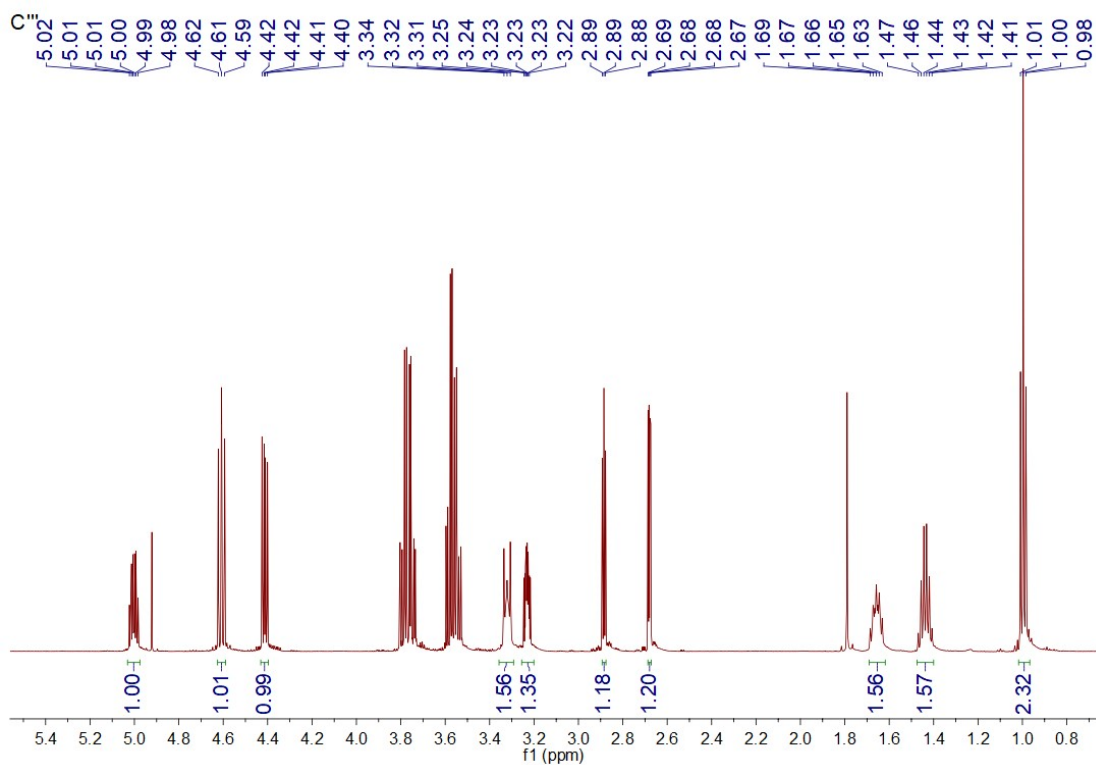

**Figure S21.** The fifth run of S-1-Zn-after spall as a catalyst in epichlorohydrin.

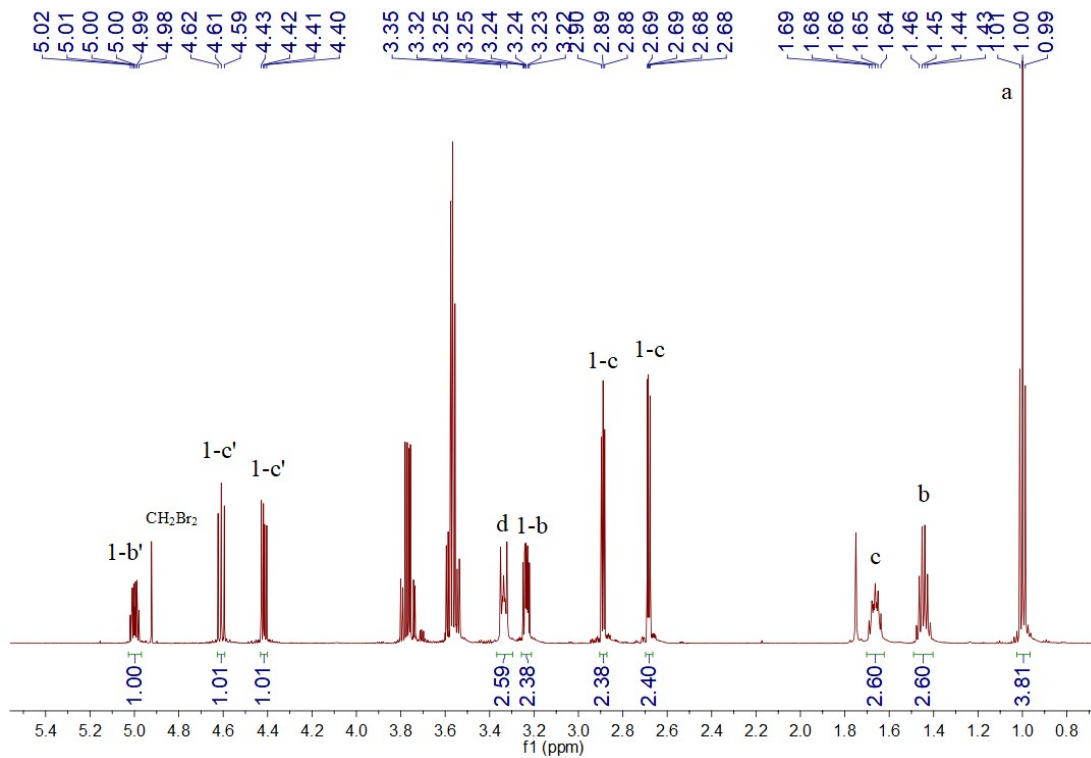

**Figure S22.** The first run of S-1-Cd-crystal as a catalyst in epichlorohydrin.

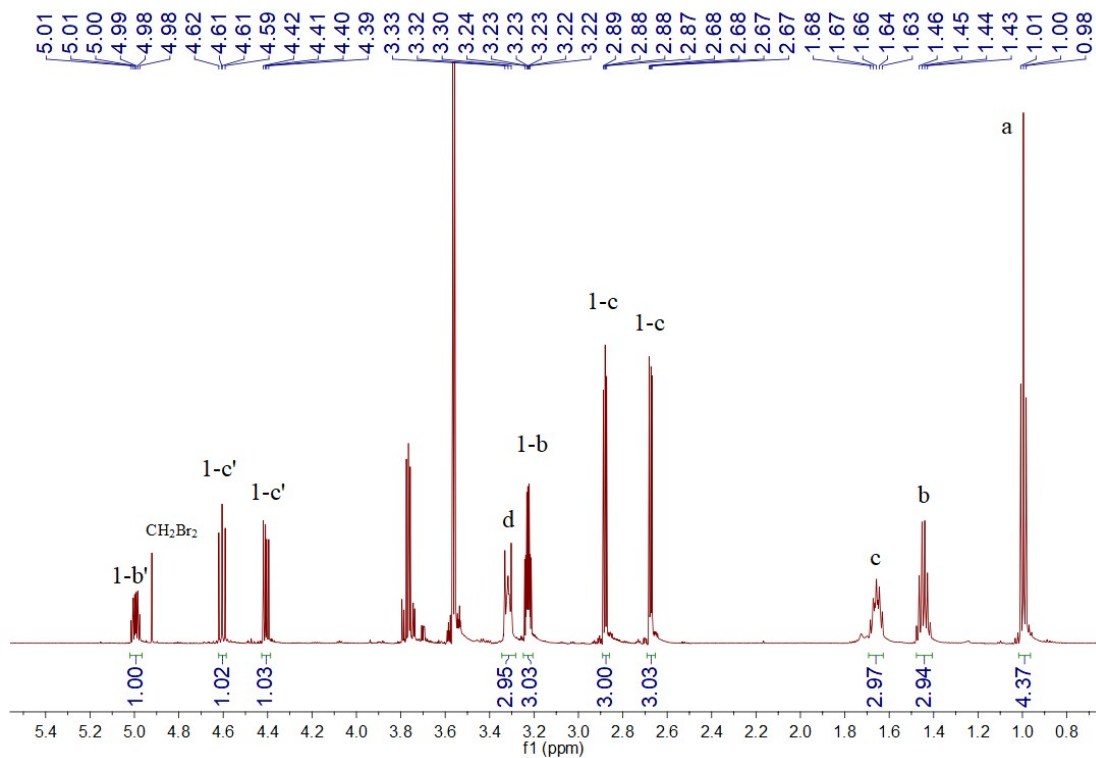

**Figure S23.** The first run of S-1-Cd-after spall as a catalyst in epichlorohydrin.

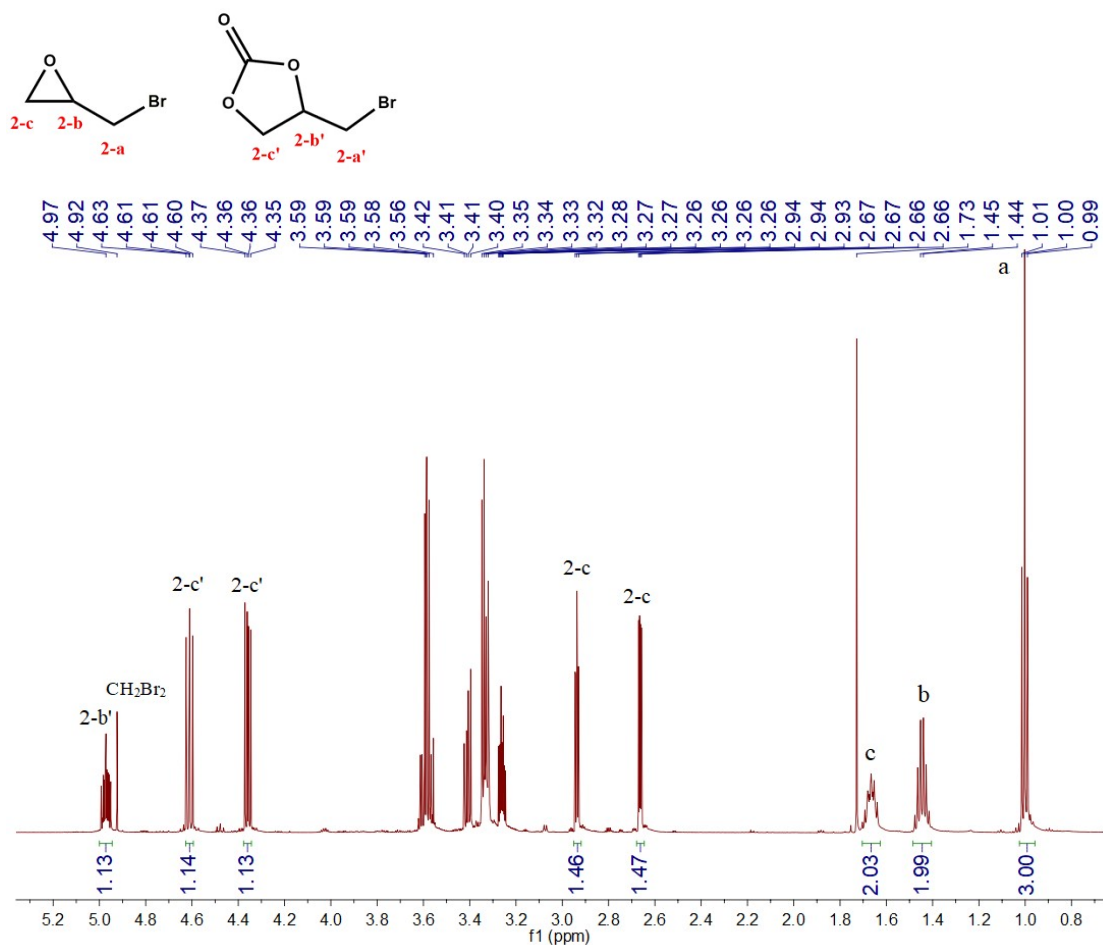

**Figure S24.** The first run of S-1-Zn-crystal as a catalyst in 1-Bromo-2,3-epoxypropane.

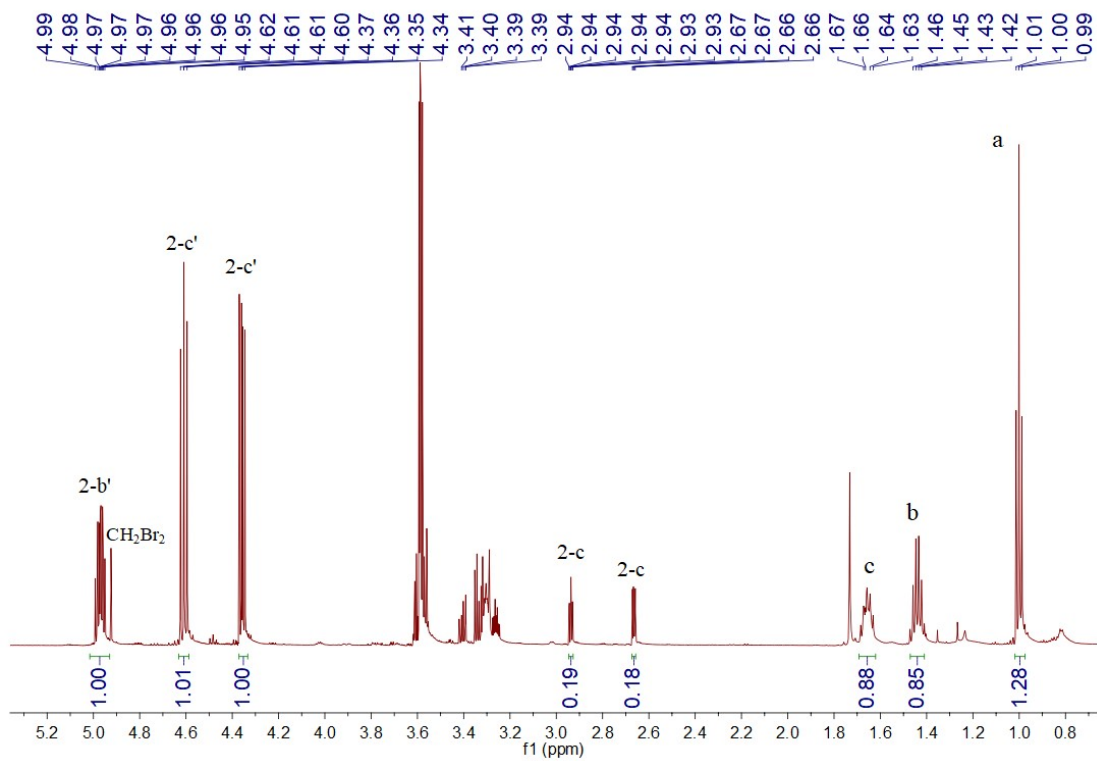

**Figure S25.** The first run of S-1-Zn-after spall as a catalyst in 1-Bromo-2,3-epoxypropane.

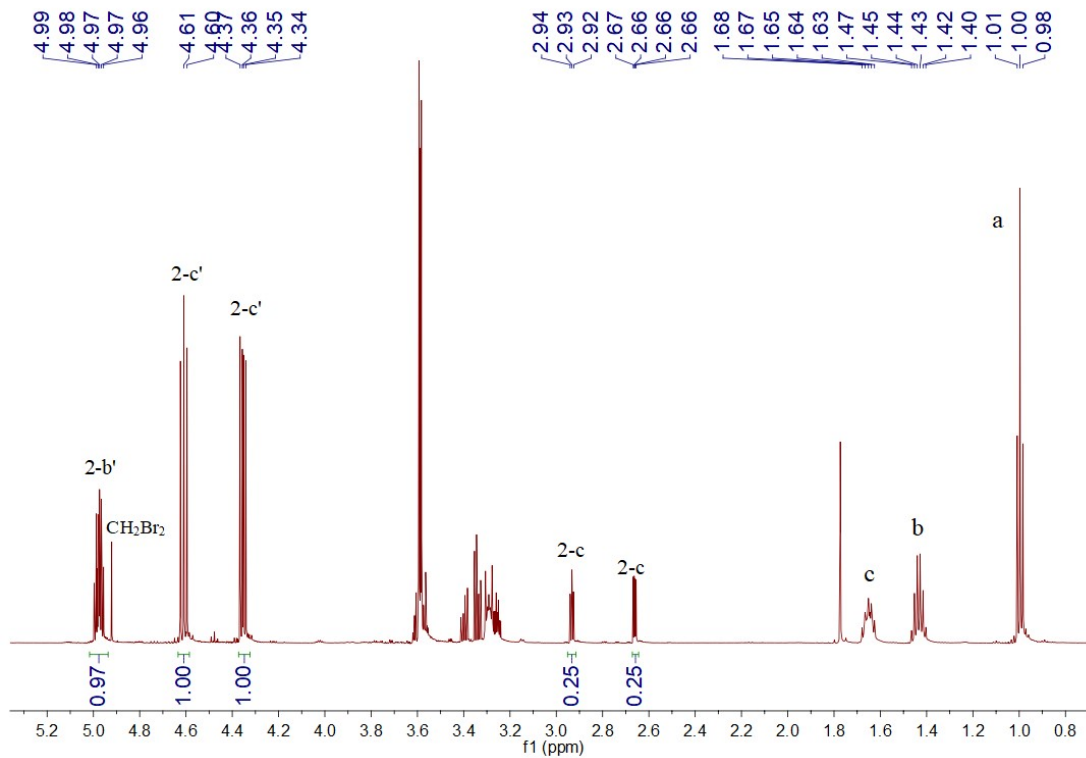

**Figure S26.** The second run of S-1-Zn-after spall as a catalyst in 1-Bromo-2,3-epoxypropane.

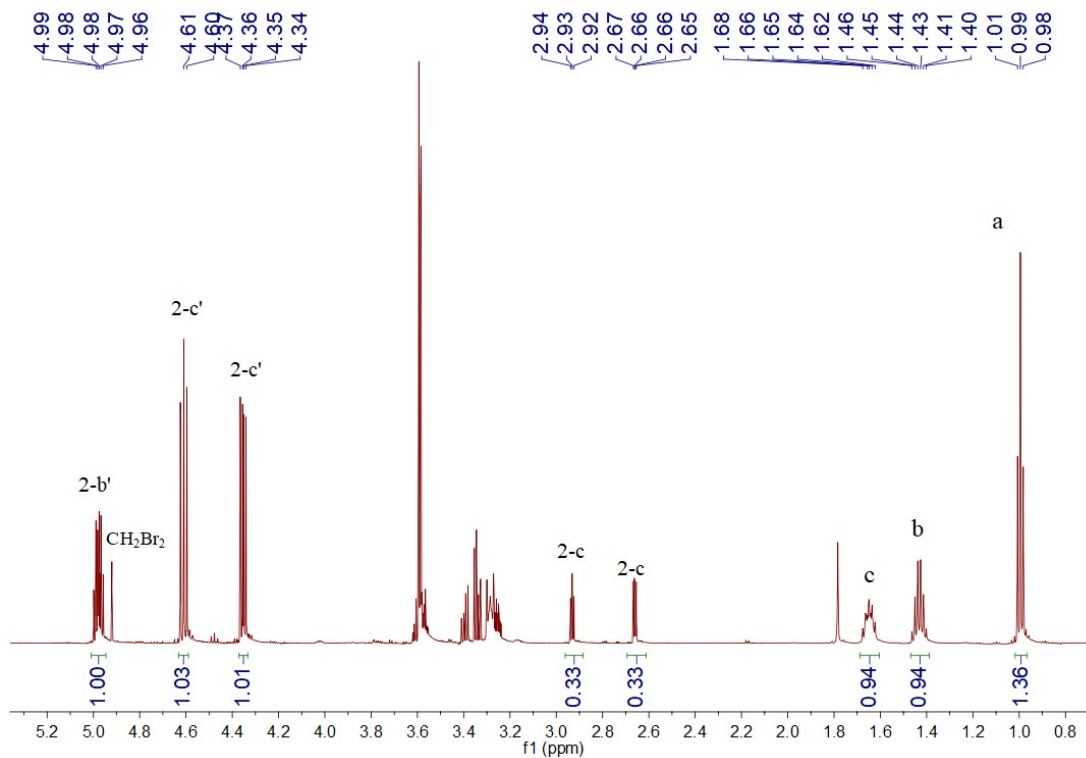

**Figure S27.** The third run of S-1-Zn-after spall as a catalyst in 1-Bromo-2,3-epoxypropane.



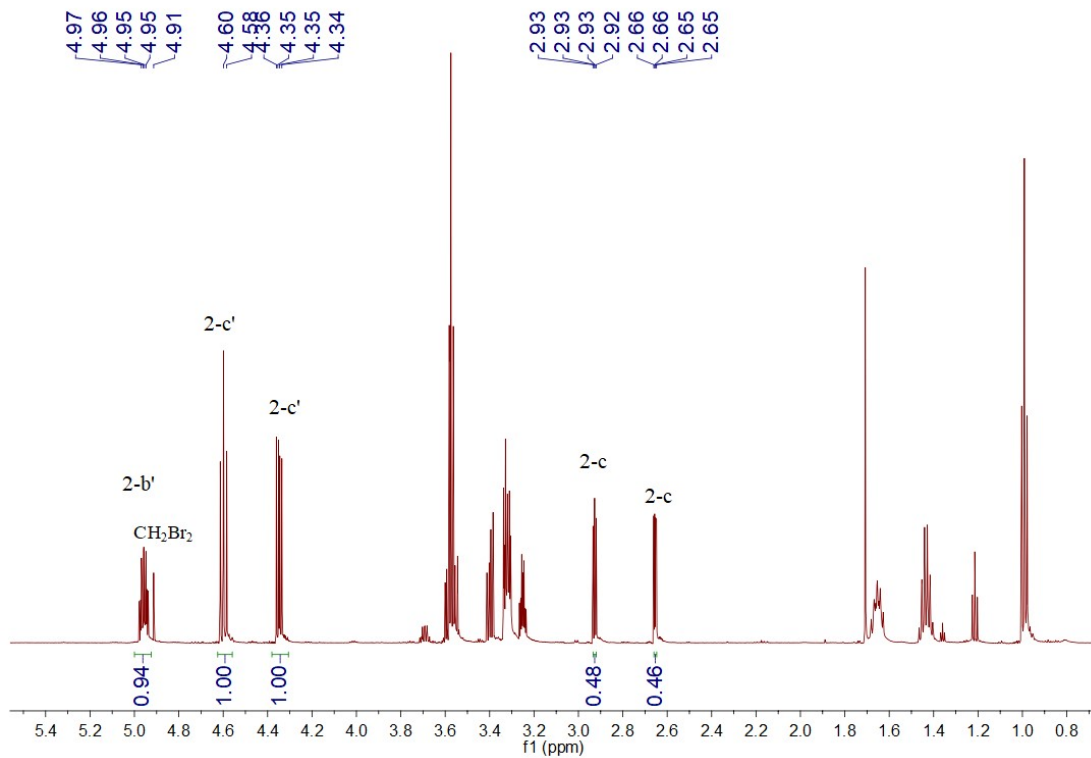

**Figure S28.** The fourth run of S-1-Zn-after spall as a catalyst in 1-Bromo-2,3-epoxypropane.

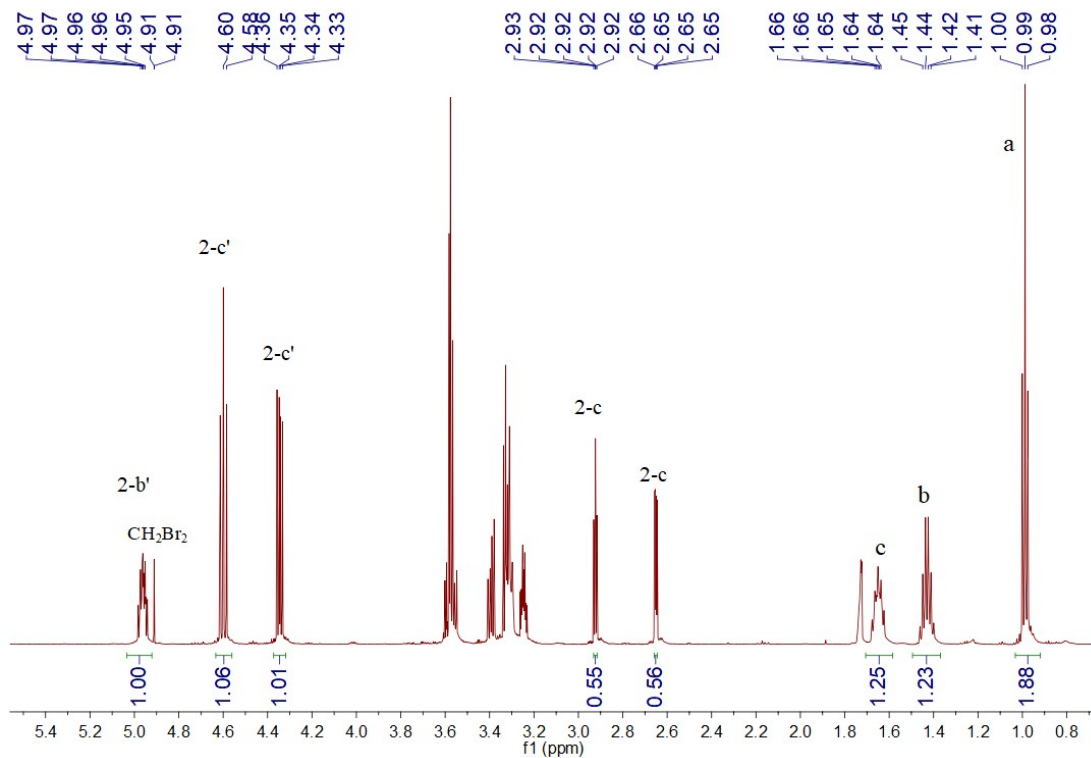

**Figure S29.** The fifth run of S-1-Zn-after spall as a catalyst in 1-Bromo-2,3-epoxypropane.

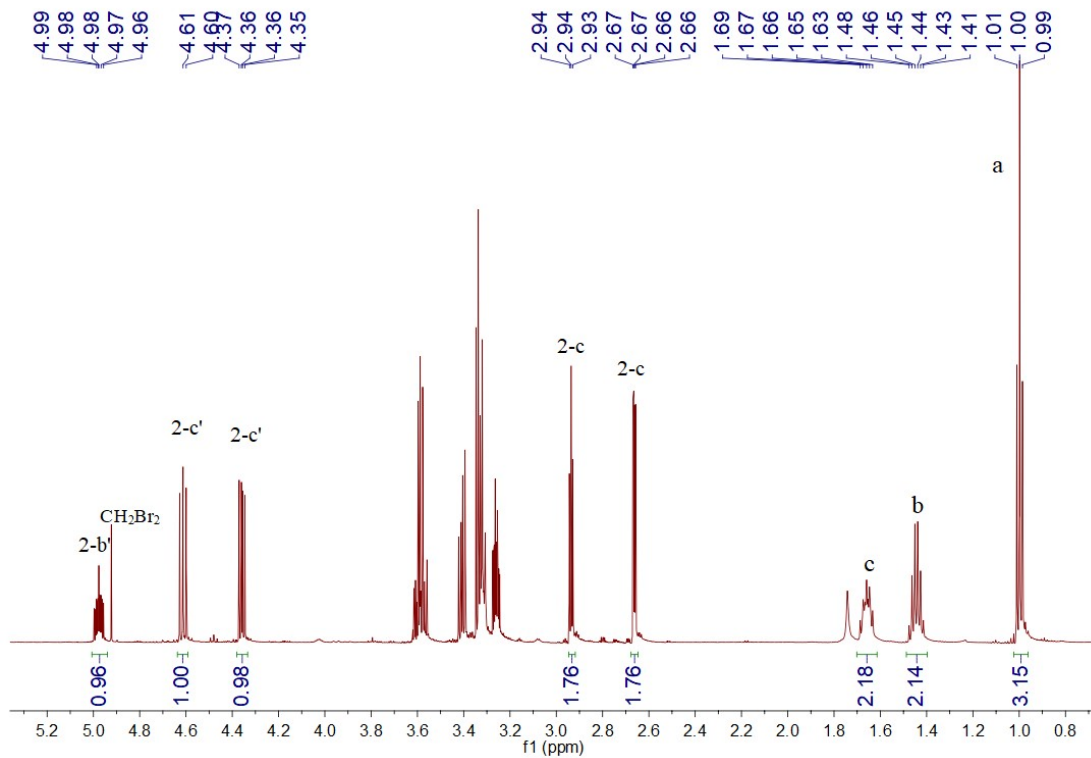

**Figure S30.** The first run of S-1-Cd-crystal as a catalyst in 1-Bromo-2,3-epoxypropane.

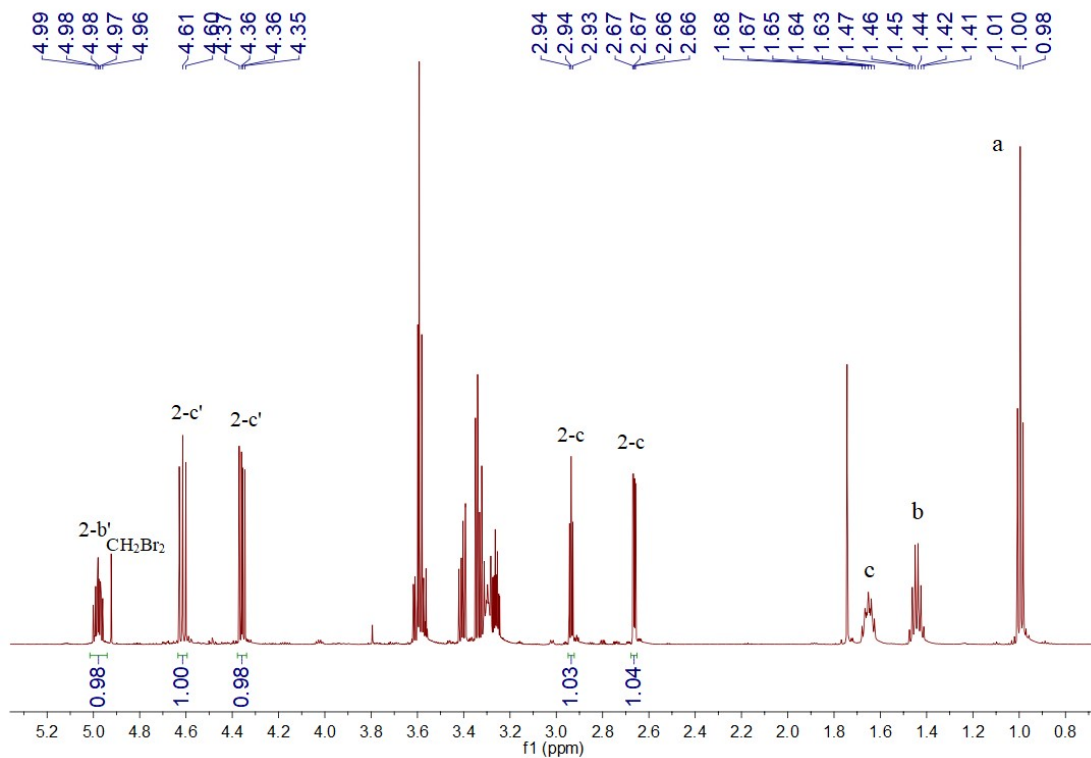

**Figure S31.** The first run of S-1-Cd-after spall as a catalyst in 1-Bromo-2,3-epoxypropane.

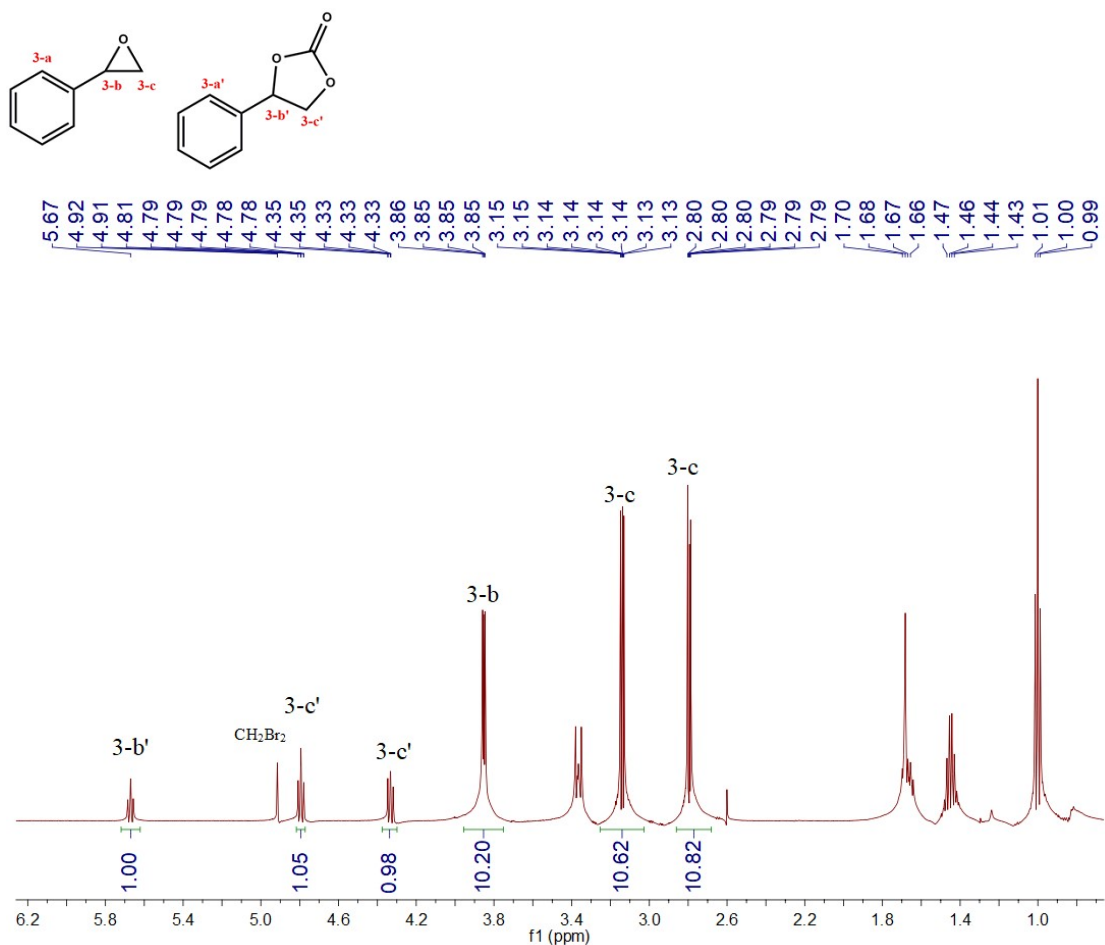

**Figure S32.** The first run of S-1-Zn-crystal as a catalyst in Styrene oxide.

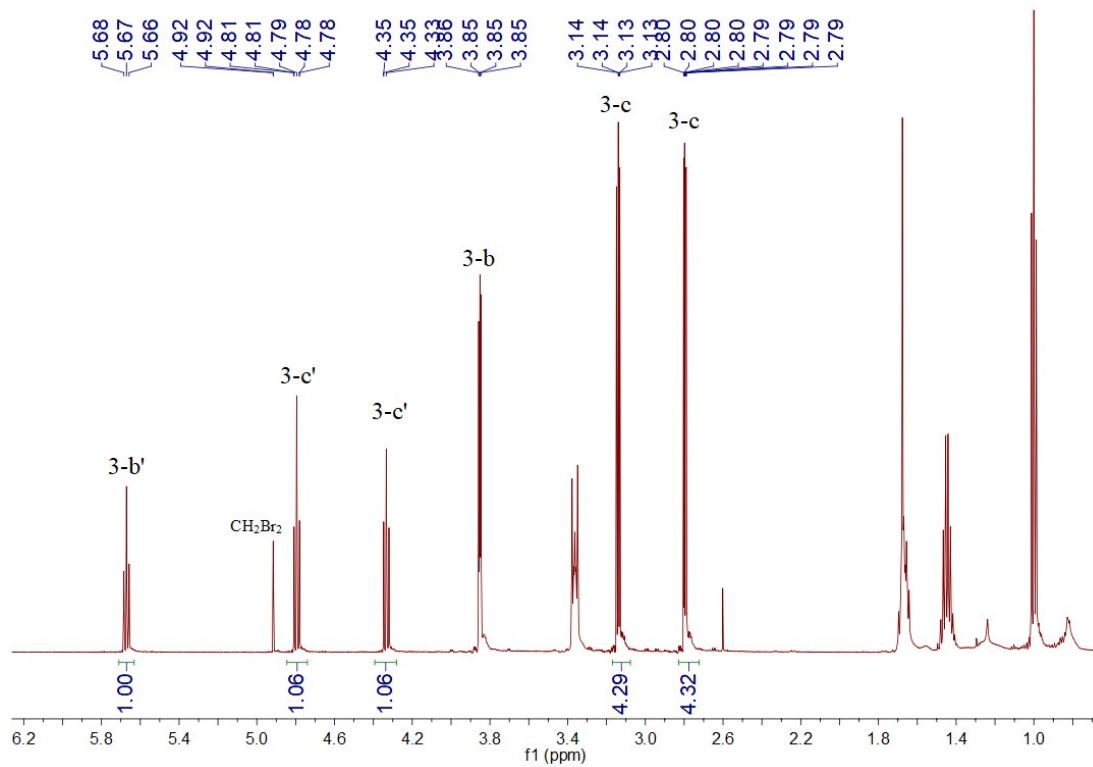

**Figure S33.** The first run of S-1-Zn-after spall as a catalyst in Styrene oxide.

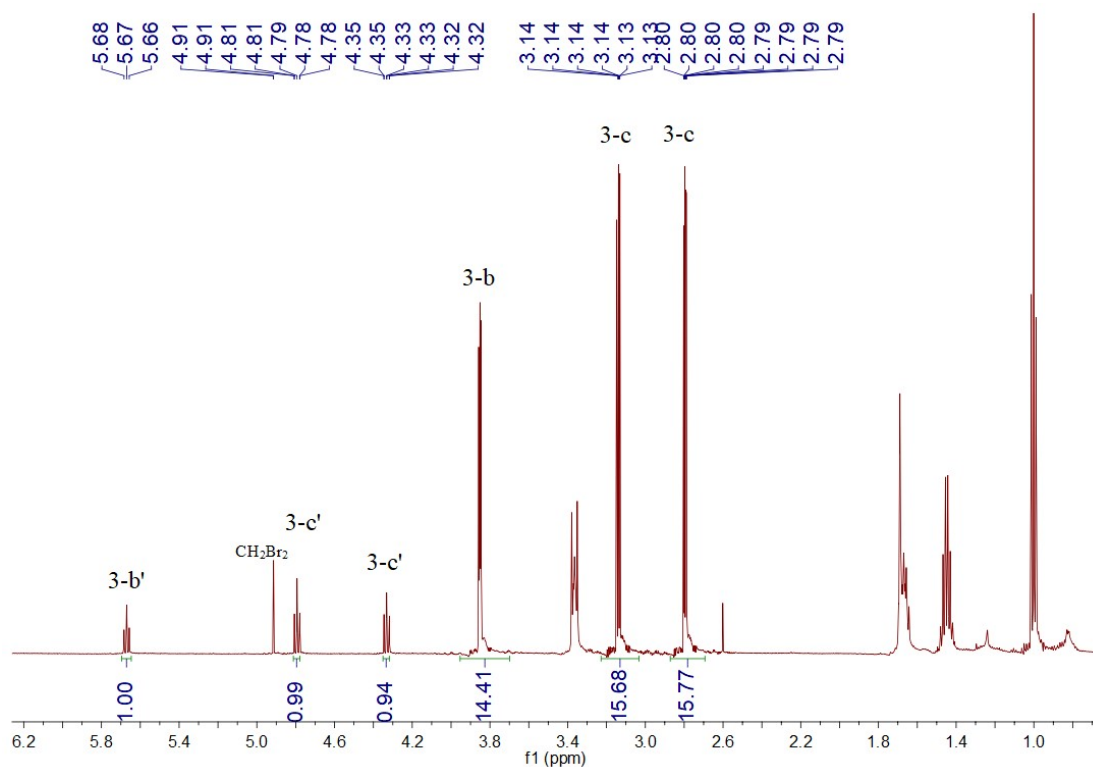

Figure S34. The first run of S-1-Cd-crystal as a catalyst in Styrene oxide.

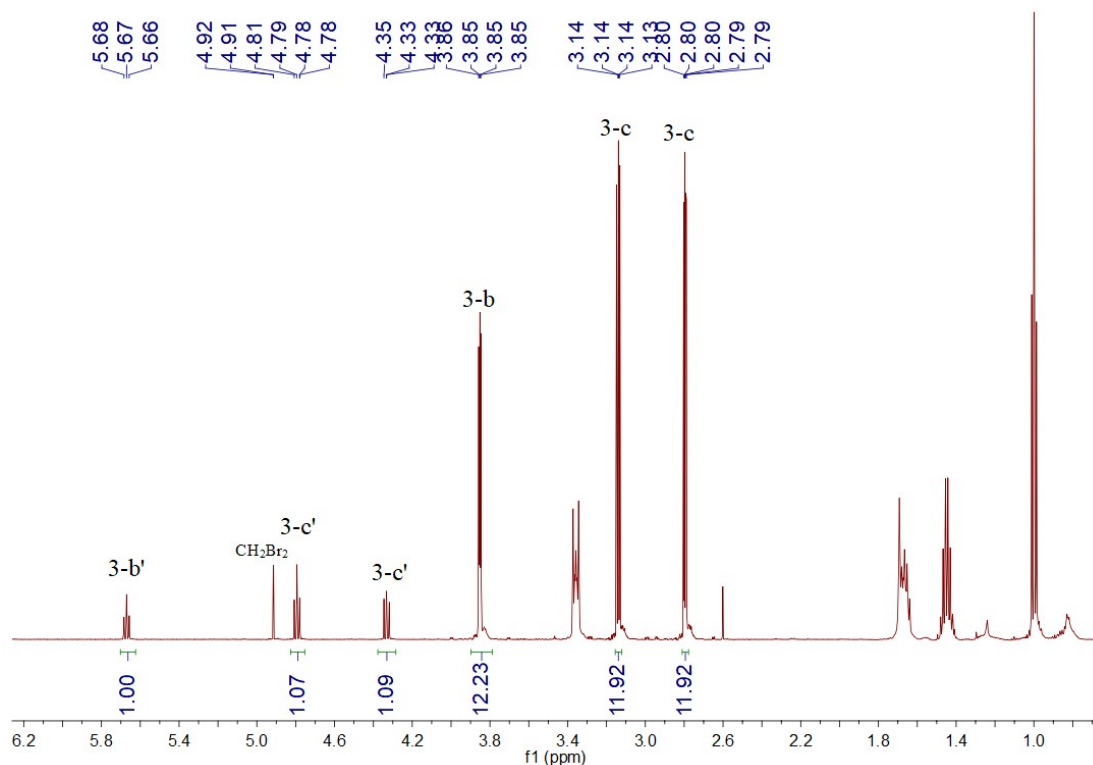

Figure S35. The first run of S-1-Cd-after spall as a catalyst in Styrene oxide.

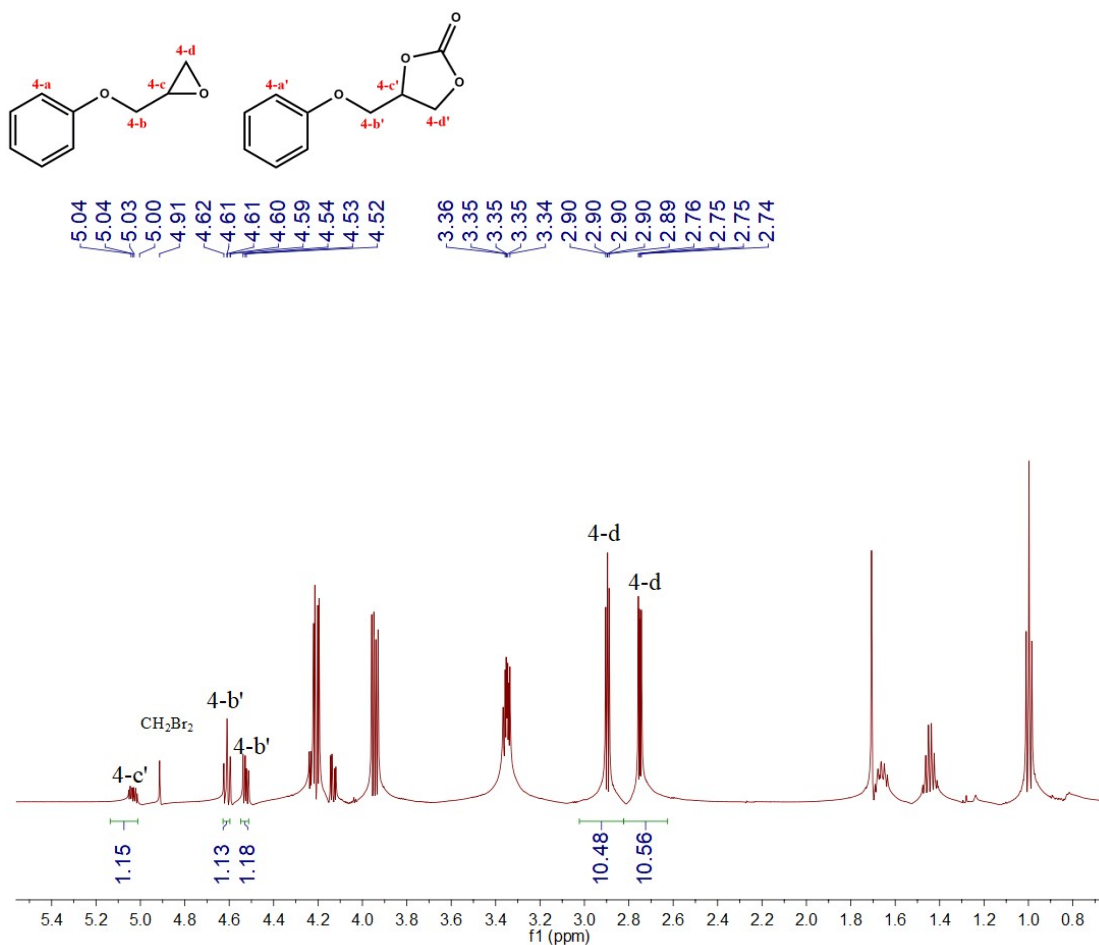

**Figure S36** The first run of S-1-Zn-crystal as a catalyst in glycidyl phenyl ether.

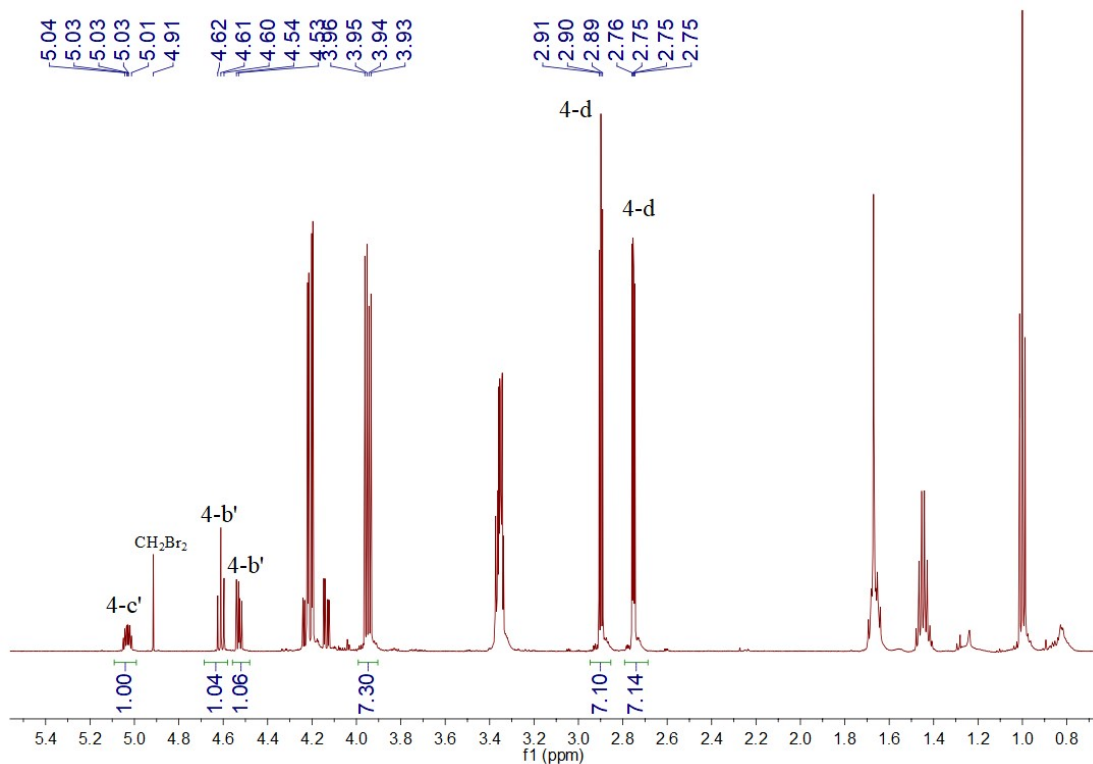

**Figure S37.** The first run of S-1-Zn-after spall as a catalyst in glycidyl phenyl ether.

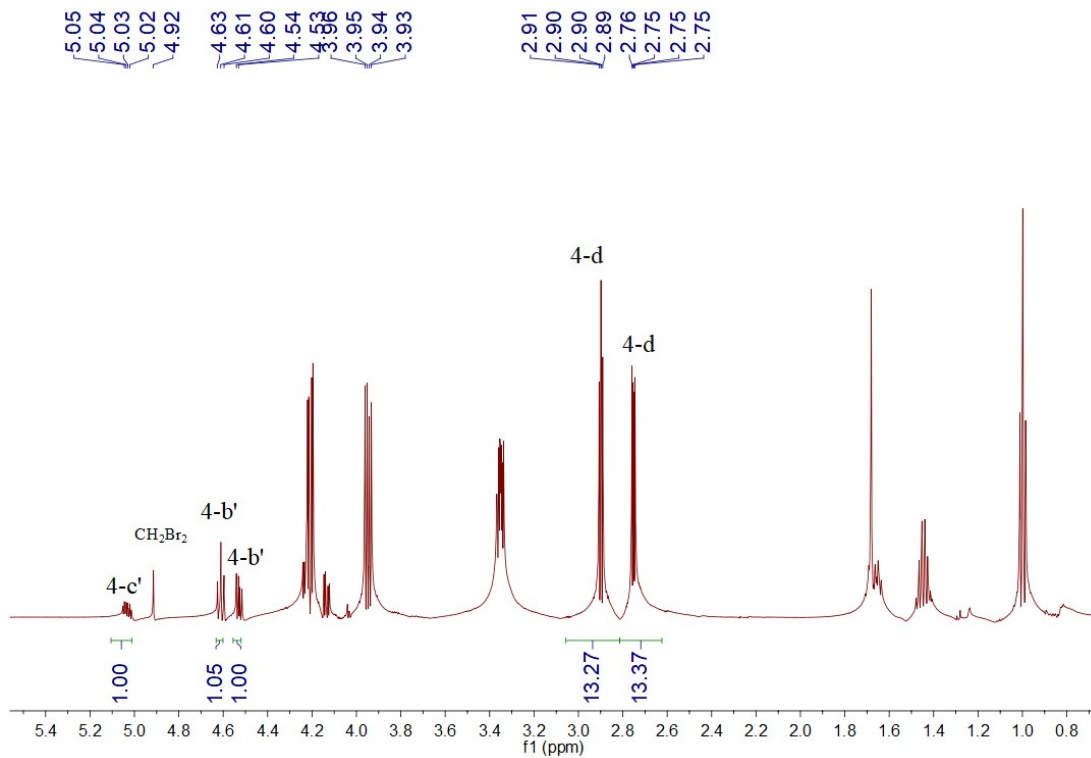

**Figure S38.** The first run of S-1-Cd-crystal as a catalyst in glycidyl phenyl ether.

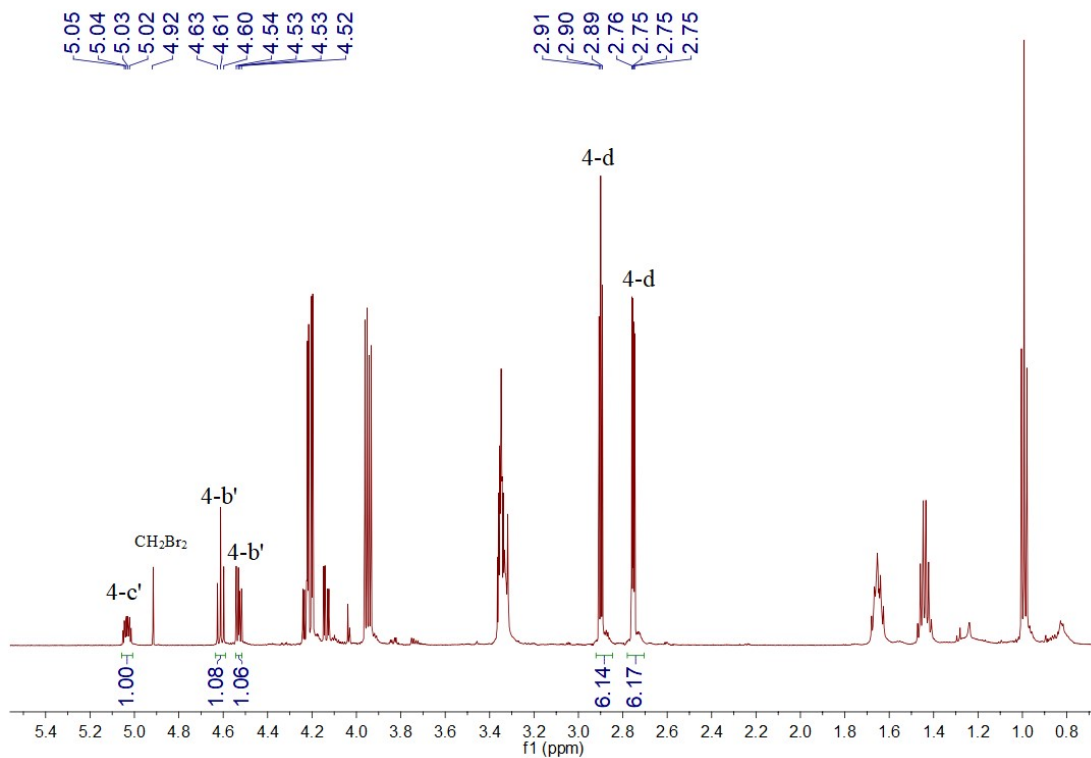

**Figure S39.** The first run of S-1-Cd-after spall as a catalyst in glycidyl phenyl ether.

## Controlled experiment

**Table S7.** Only use TBAB as co-catalyst in the catalytic reaction of four substrates.

| Substrate                                                                         | Crystals | Co-catalyst | Yield (%) |
|-----------------------------------------------------------------------------------|----------|-------------|-----------|
| 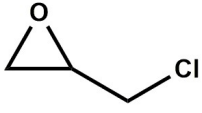 | none     | TBAB        | 20.0      |
|  | none     | TBAB        | 31.6      |
|  | none     | TBAB        | 3.6       |
|  | none     | TBAB        | 5.5       |

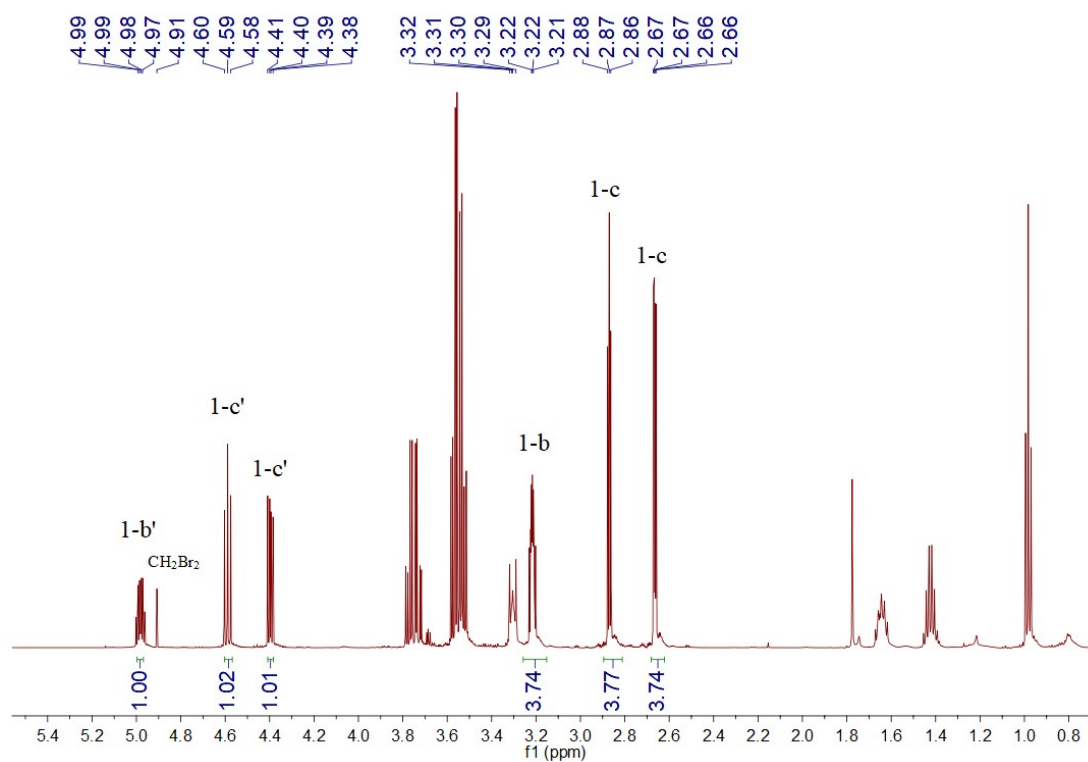

**Figure S40.** Only TBAB as co-catalyst in epichlorohydrin.

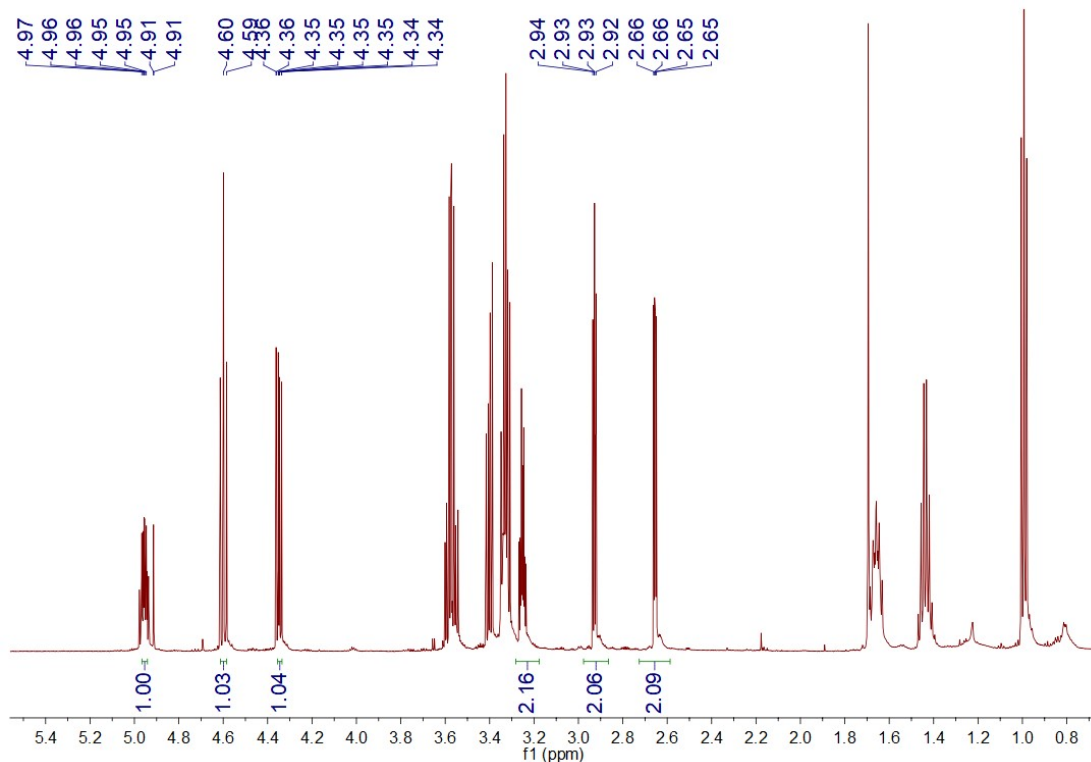

Figure S41. Only TBAB as co-catalyst in 1-Bromo-2,3-epoxypropane.

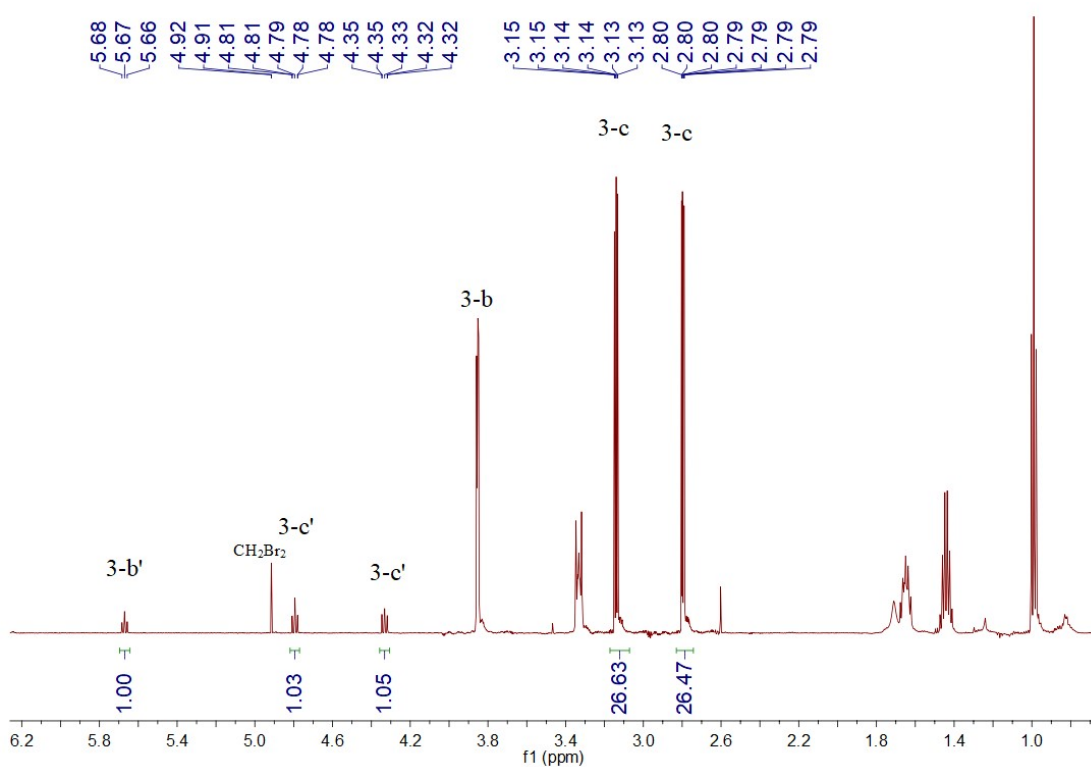

Figure S42. Only TBAB as co-catalyst in Styrene oxide.



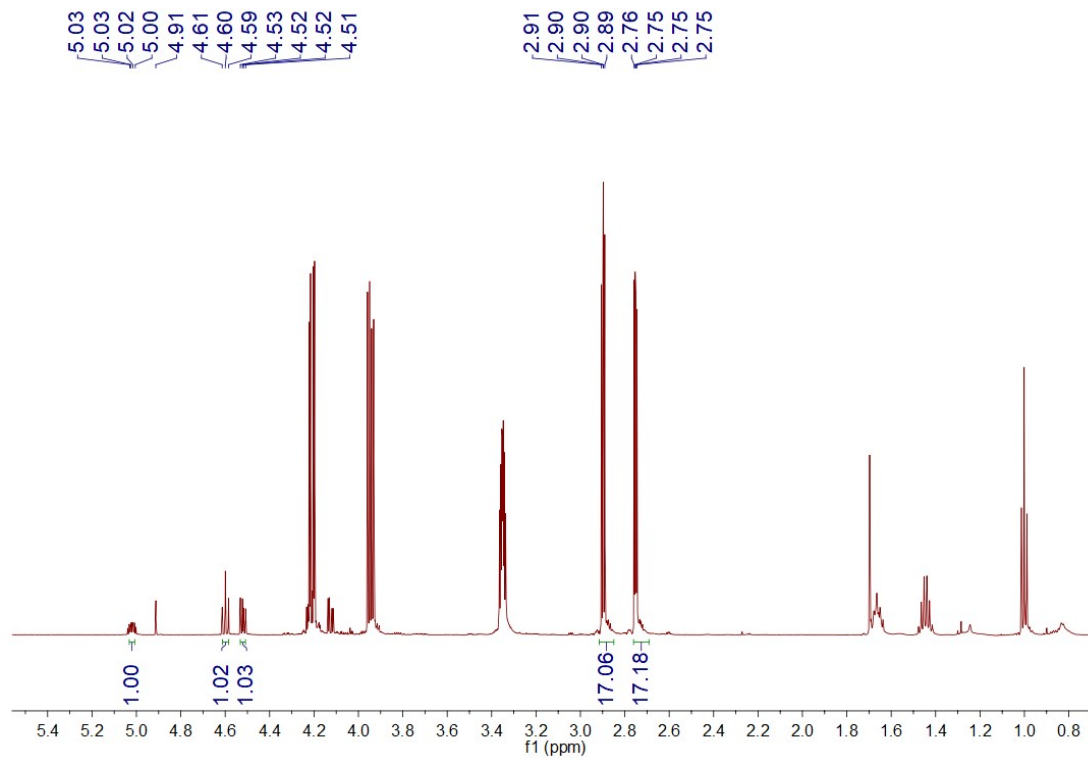

**Figure S43.** Only TBAB as co-catalyst in glycidyl phenyl ether.

### Co-catalyst comparison

**Table S8.** Only use S-1-Zn-crystal as a catalyst in the catalytic reaction of four co-catalysts.

| Substrate | TBAF | TBACl | TBAB | TBAI |
|-----------|------|-------|------|------|
|           | 4.8  | 35.1  | 30.1 | 31.0 |
|           | 39.8 | 75.7  | 42.5 | 63.3 |

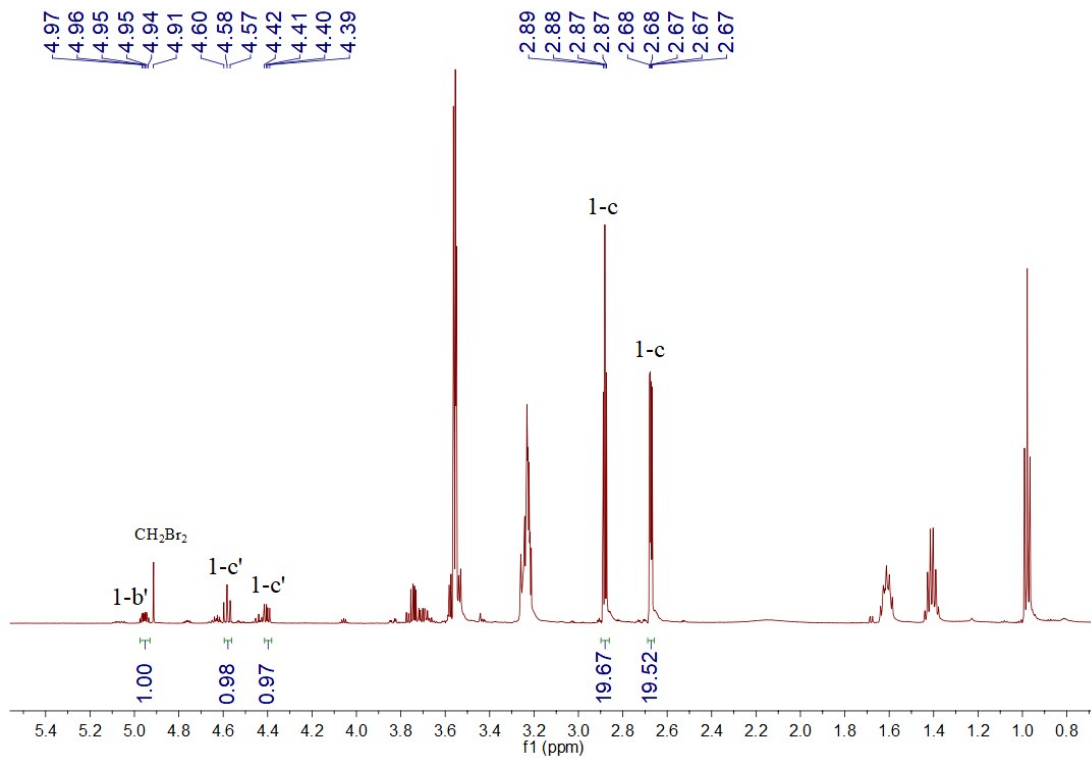

**Figure S44.** The TBAF as co-catalyst and S-1-Zn-crystal as a catalyst in epichlorohydrin.

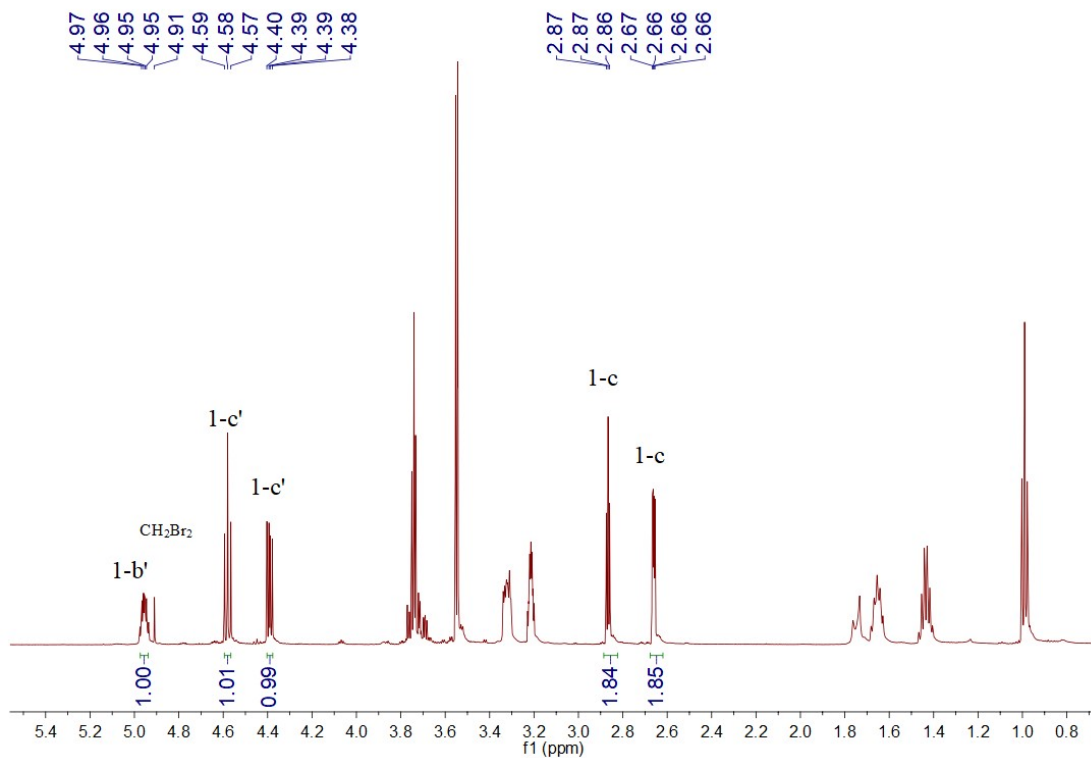

**Figure S45.** The TBACl as co-catalyst and S-1-Zn-crystal as a catalyst in epichlorohydrin.

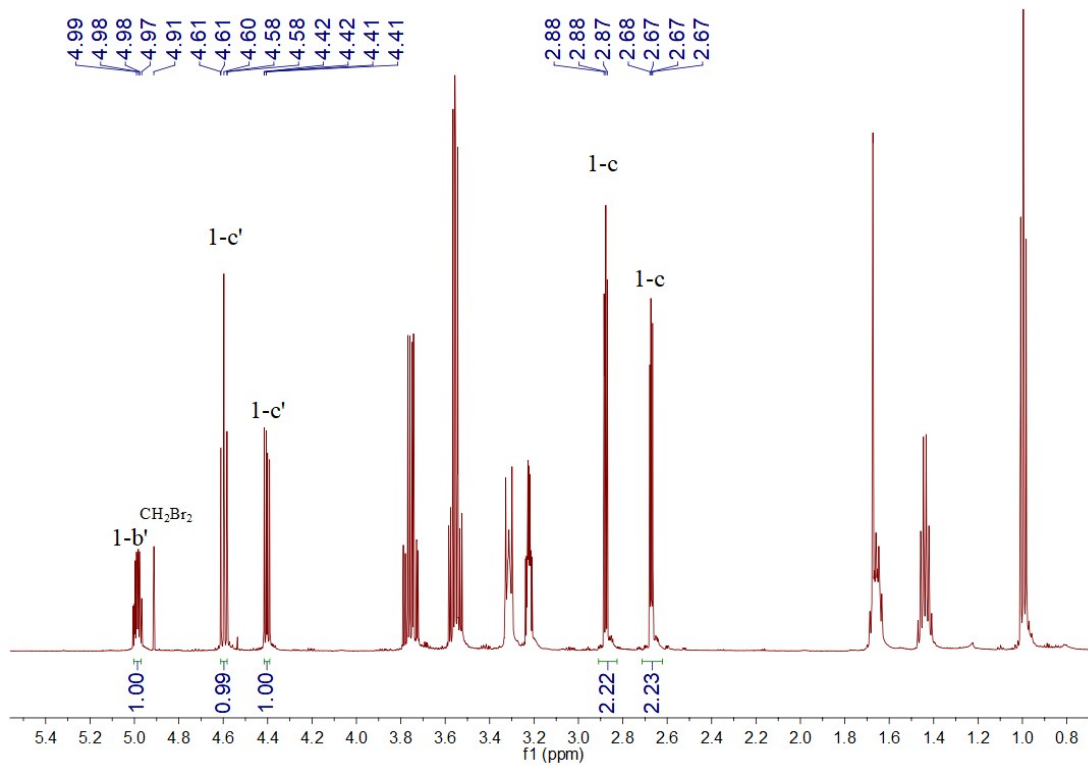

**Figure S46.** The TBAI as co-catalyst and S-1-Zn-crystal as a catalyst in epichlorohydrin.

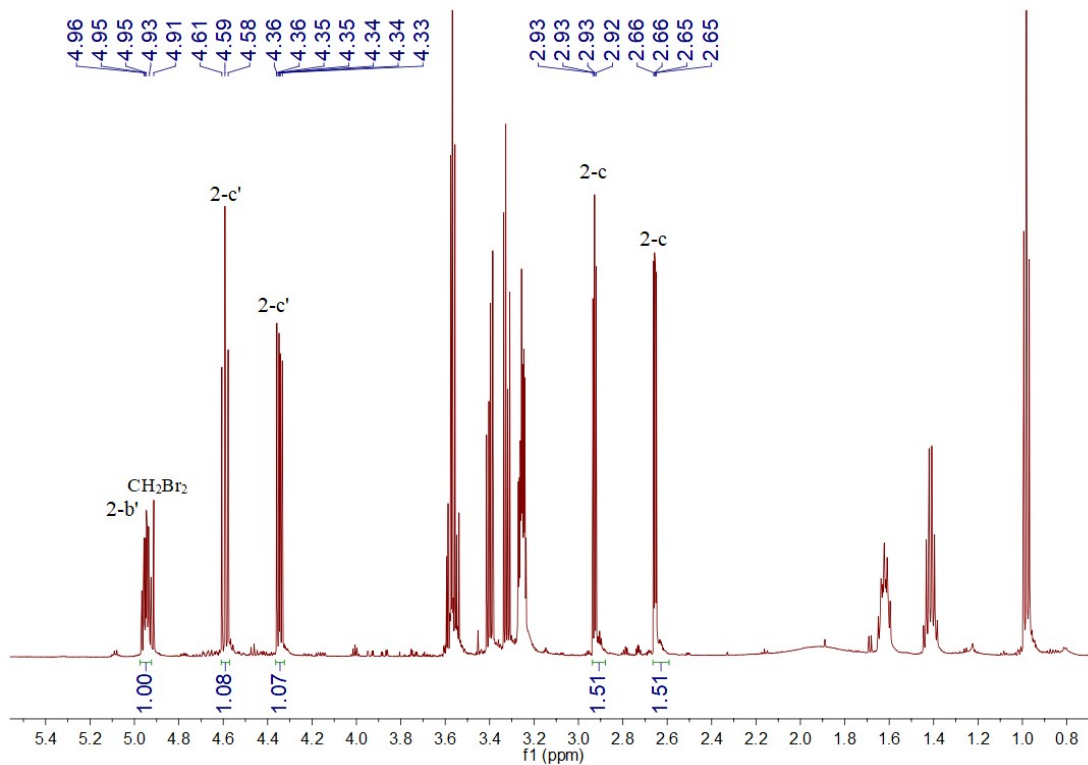

**Figure S47.** The TBAF as co-catalyst and S-1-Zn-crystal as a catalyst in 1-Bromo-2,3-epoxypropane.

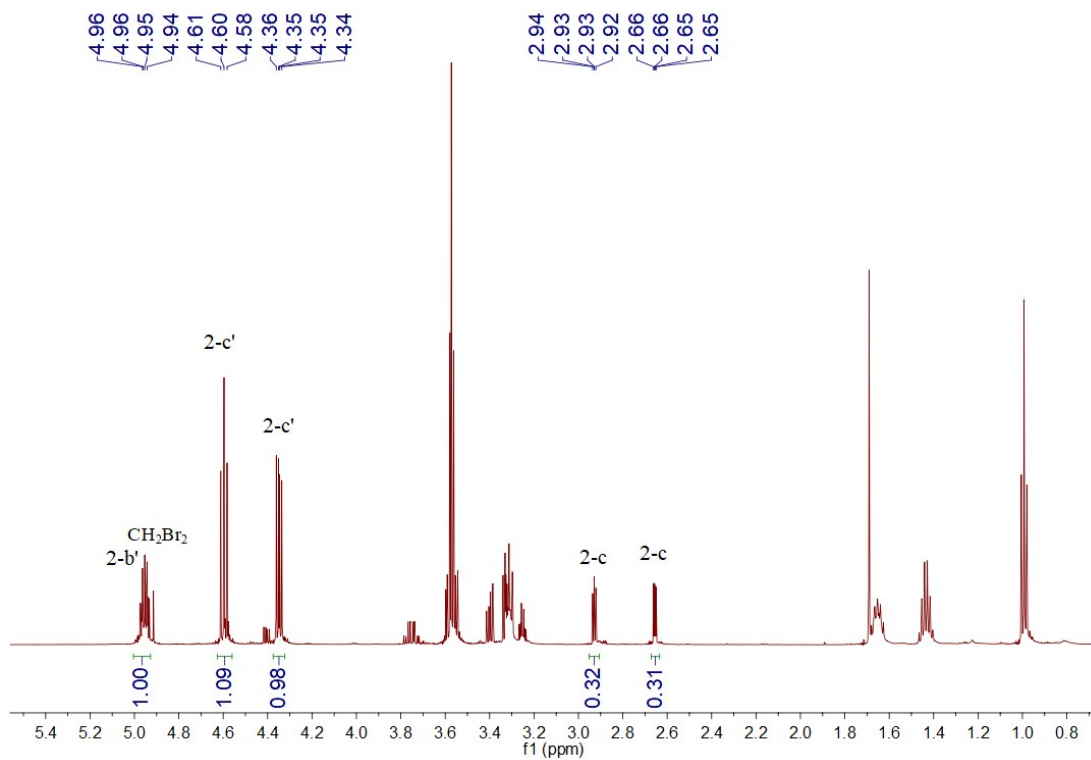

**Figure S48.** The TBACl as co-catalyst and S-1-Zn-crystal as a catalyst in 1-Bromo-2,3-epoxypropane.

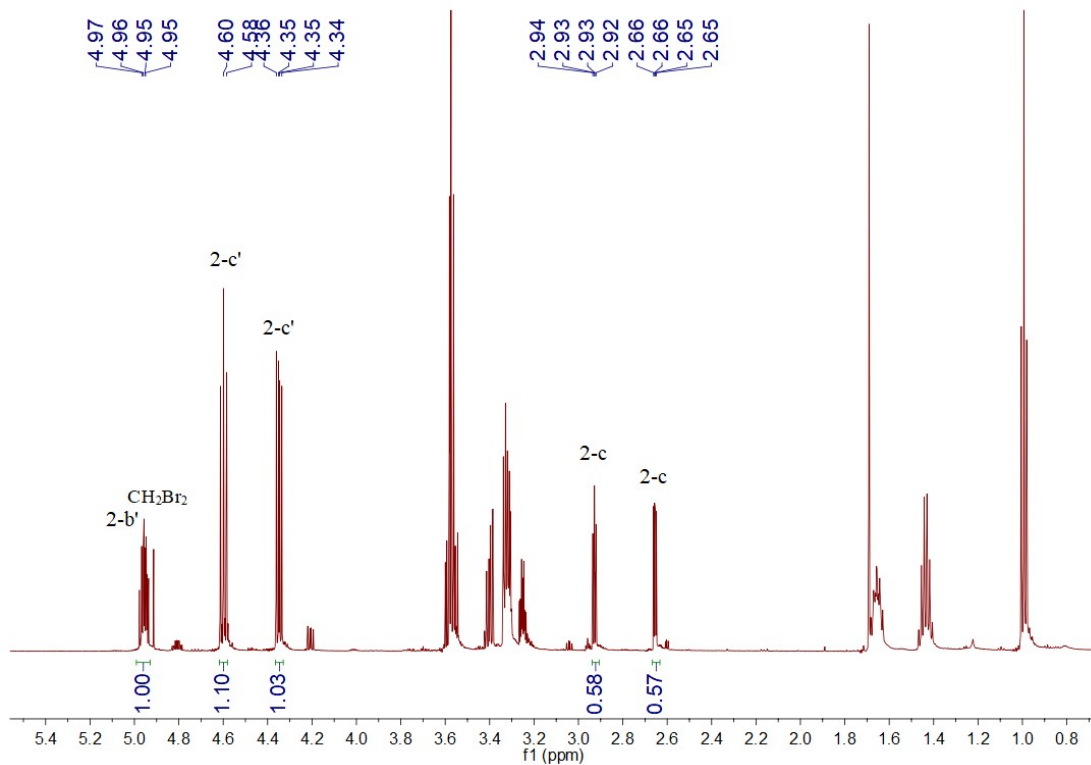

**Figure S49.** The TBAI as co-catalyst and S-1-Zn-crystal as a catalyst in 1-Bromo-2,3-epoxypropane.

## Reference

- [1] Li X Y, Ma L N, Liu Y, et al. Honeycomb metal–organic framework with lewis acidic and basic bifunctional sites: selective adsorption and CO<sub>2</sub> catalytic fixation[J]. *ACS applied materials & interfaces*, 2018, 10(13): 10965-10973.
- [2] Gong Y N, Liu J W, Mei J H, et al. Incorporation of Chromophores into Metal–Organic Frameworks for Boosting CO<sub>2</sub> Conversion[J]. *Inorganic Chemistry*, 2021, 60(19): 14924-14931.
- [3] Zhang S, Zhang H, Cao F, et al. Catalytic behavior of graphene oxides for converting CO<sub>2</sub> into cyclic carbonates at one atmospheric pressure[J]. *ACS Sustainable Chemistry & Engineering*, 2018, 6(3): 4204-4211.
- [4] Yao C, Zhou S, Kang X, et al. A cationic zinc–organic framework with Lewis acidic and basic bifunctional sites as an efficient solvent-free catalyst: CO<sub>2</sub> fixation and Knoevenagel condensation reaction[J]. *Inorganic Chemistry*, 2018, 57(17): 11157-11164.
- [5] Zhang B, Guo P Y, Ma L N, et al. Two Robust In (III)-Based Metal–Organic Frameworks with Higher Gas Separation, Efficient Carbon Dioxide Conversion, and Rapid Detection of Antibiotics[J]. *Inorganic Chemistry*, 2020, 59(7): 5231-5239.
- [6] Wang W J, Liu J, Yan Y T, et al. Uncommon thioether-modified metal–organic frameworks with unique selective CO<sub>2</sub> sorption and efficient catalytic conversion[J]. *CrystEngComm*, 2021, 23(6): 1447-1454.
- [7] Shao D, Shi J, Zhang J, et al. Solvent impedes CO<sub>2</sub> cycloaddition on metal–organic frameworks[J]. *Chemistry–An Asian Journal*, 2018, 13(4): 386-389.
- [8] Ng C K, Toh R W, Lin T T, et al. Metal–salen molecular cages as efficient and recyclable heterogeneous catalysts for cycloaddition of CO<sub>2</sub> with epoxides under ambient conditions[J]. *Chemical science*, 2019, 10(5): 1549-1554.
- [9] Guo Z, Xu Y, Chao J, et al. Lithium organoaluminate complexes as catalysts for the conversion of CO<sub>2</sub> into cyclic carbonates[J]. *European Journal of Inorganic Chemistry*, 2020, 2020(29): 2835-2841.
- [10] Li P Z, Wang X J, Liu J, et al. A triazole-containing metal–organic framework as a highly effective and substrate size-dependent catalyst for CO<sub>2</sub> conversion[J]. *Journal of the American Chemical Society*, 2016, 138(7): 2142-2145.
- [11] Liang J, Huang Y B, Cao R. Metal–organic frameworks and porous organic polymers for sustainable fixation of carbon dioxide into cyclic carbonates[J]. *Coordination Chemistry Reviews*, 2019, 378: 32-65.
- [12] Tombesi A, Pettinari C. Metal Organic Frameworks as Heterogeneous Catalysts in Olefin Epoxidation and Carbon Dioxide Cycloaddition[J]. *Inorganics*, 2021, 9(11): 81.
